# Supplementary material for: Cholesterol removal improves performance of a model biomimetic system to co-deliver a photothermal agent and a STING agonist for cancer immunotherapy
Source: PubMed Central journal article supplement (PMC10444796; doi:10.1038/s41467-023-40814-9), 2023-08-22
Supplement: 41467_2023_40814_MOESM1_ESM.pdf [file 41467_2023_40814_MOESM1_ESM.pdf]

## Supplementary Information

### **Cholesterol removal improves performance of a model biomimetic system to co-deliver a photothermal agent and a STING agonist for cancer immunotherapy**

Lin Li<sup>1</sup>, Mengxing Zhang<sup>2</sup>, Jing Li<sup>1</sup>, Tiantian Liu<sup>2</sup>, Qixue Bao<sup>1</sup>, Xi Li<sup>1</sup>, Jiaying Long<sup>3</sup>, Leyao Fu<sup>1</sup>, Zhirong Zhang<sup>3</sup>, Shiqi Huang<sup>2</sup>, Zhenmi Liu<sup>1,\*</sup>, Ling Zhang<sup>2,1,\*</sup>

<sup>1</sup> Institute of Systems Epidemiology, West China School of Public Health and West China Fourth Hospital, Sichuan University, Chengdu 610041, China.

<sup>2</sup> Med-X center for Materials, College of Polymer Science and Engineering, Sichuan University, Chengdu 610065, China.

<sup>3</sup> Key Laboratory of Drug Targeting and Drug Delivery Systems of Ministry of Education, West China School of Pharmacy, Sichuan University, Chengdu 610065, China.

#### **\*Corresponding author**

Prof. Ling Zhang

E-mail: [zhangling83@scu.edu.cn](mailto:zhangling83@scu.edu.cn)

Prof. Zhenmi Liu

E-mail: [liuzhenmi1983@hotmail.com](mailto:liuzhenmi1983@hotmail.com)

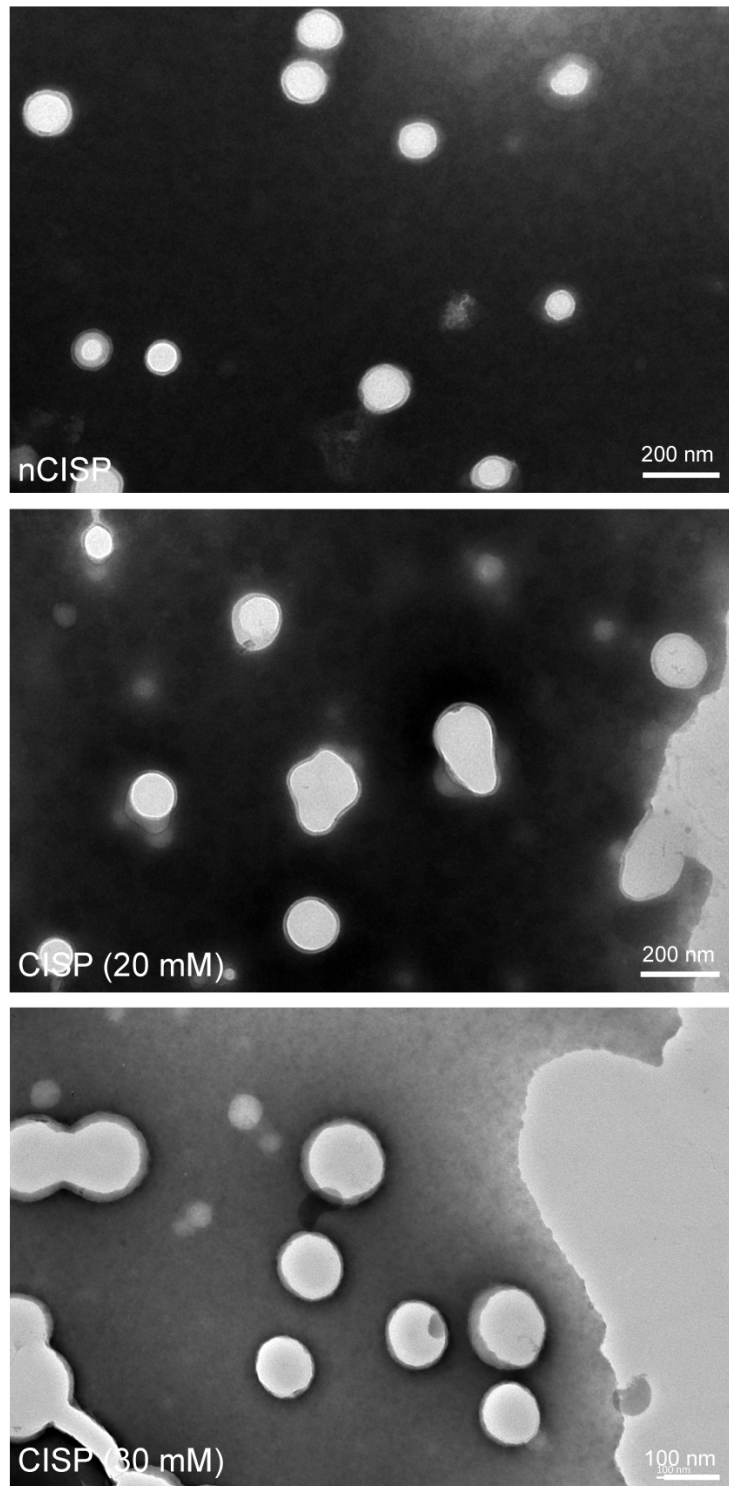

**Supplementary Figure 1. Representative transmission electron microscope (TEM) images of nCISP, CISP (20 mM) and CISP (30 mM).**  $n = 3$  independent samples. The experiments were repeated three times independently with similar results. QFN, Quercetin-ferrum nanoparticles; QFN<sub>717</sub>, QFN loaded with SR-717; nCISP, normal-Cholesterol cell membrane coated ICB agent and QFN<sub>717</sub>; CISP (20 mM), low-Cholesterol membrane (treated with 20 mM  $\beta$ -CD) coated ICB agent and QFN<sub>717</sub>; CISP (30 mM), low-Cholesterol membrane (treated with 30 mM  $\beta$ -CD) coated ICB agent and QFN<sub>717</sub>.

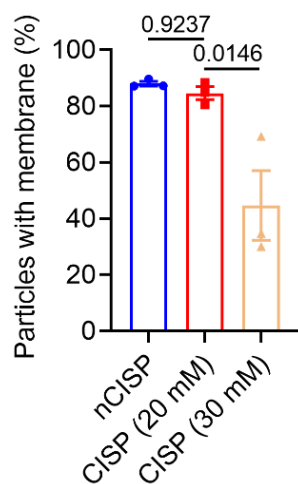

**Supplementary Figure 2. The proportion of nanoparticles coated with cell membrane detected by TEM.** Data represent mean  $\pm$  SEM,  $n = 3$  independent samples. Statistical significance was determined by one-way ANOVA test, and it was two-sided and adjustments were made for multiple comparisons. The experiments were repeated three times independently with similar results. Source data are provided as a Source Data file. QFN, Quercetin-ferrum nanoparticles; QFN<sub>717</sub>, QFN loaded with SR-717; nCISP, normal-Cholesterol cell membrane coated ICB agent and QFN<sub>717</sub>; CISP (20 mM), low-Cholesterol membrane (treated with 20 mM  $\beta$ -CD) coated ICB agent and QFN<sub>717</sub>; CISP (30 mM), low-Cholesterol membrane (treated with 30 mM  $\beta$ -CD) coated ICB agent and QFN<sub>717</sub>.

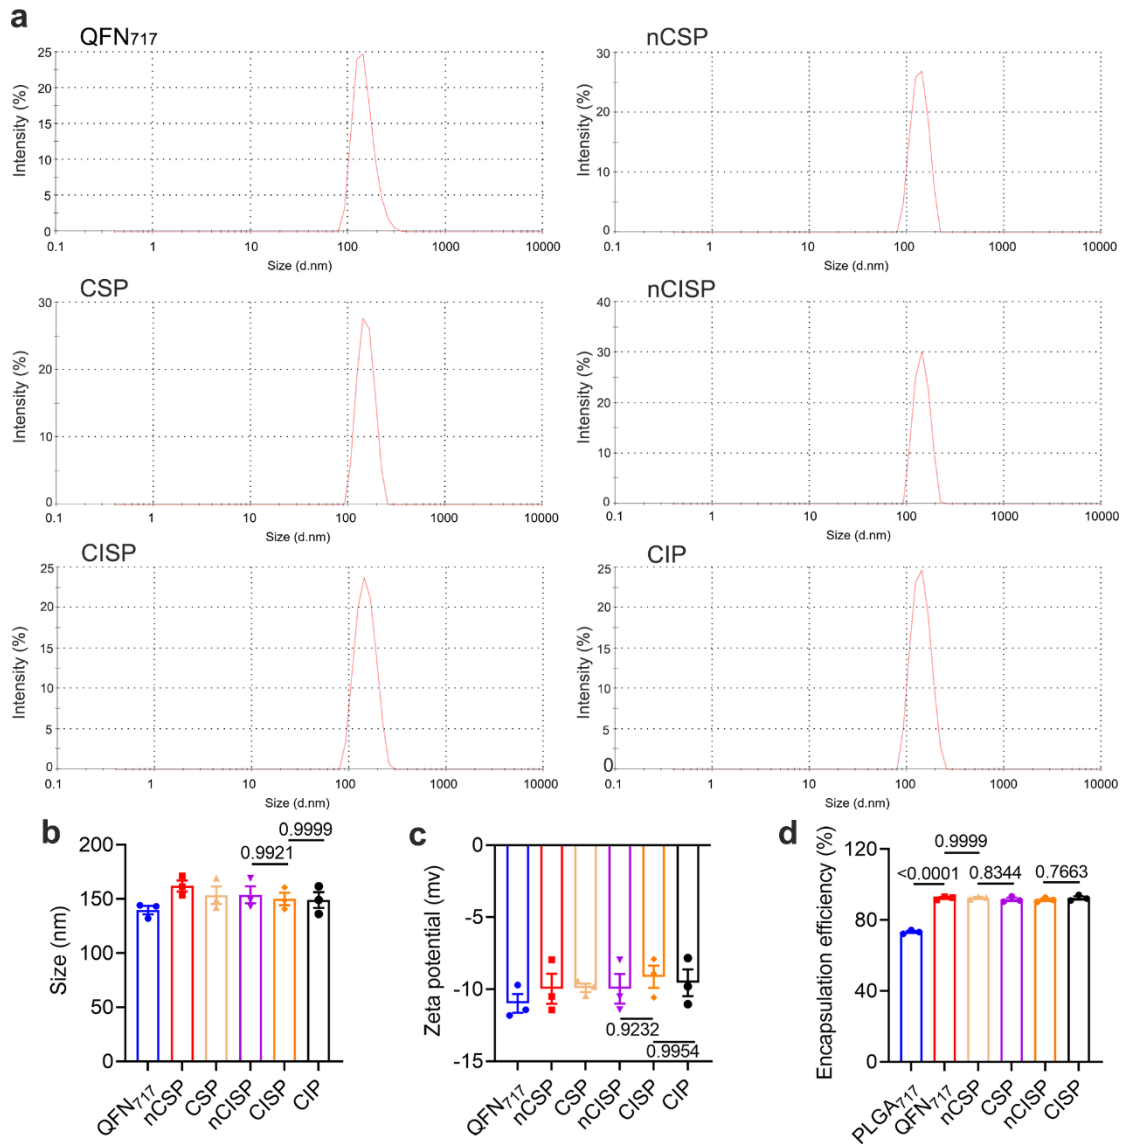

**Supplementary Figure 3. Characterization of nanoparticles.** **a, b** Sizes of QFN<sub>717</sub>, nCSP, CSP, nCISP, CISP and CIP measured by Malvern Zetasizer Nano ZS90 dynamic light scattering (DLS) analyzer (Malvern Instrument Ltd, UK). Data represent mean  $\pm$  SEM,  $n = 3$  independent samples. **c** Zeta potential of QFN<sub>717</sub>, nCSP, CSP, nCISP, CISP and CIP measured by Malvern Zetasizer Nano ZS90 dynamic light scattering (DLS) analyzer. Data represent mean  $\pm$  SEM,  $n = 3$  independent samples. **d** The encapsulation efficiency (EE%) of SR-717 in PLGA<sub>717</sub> QFN<sub>717</sub>, nCSP, CSP, nCISP and CISP. Data represent mean  $\pm$  SEM,  $n = 3$  independent samples. Statistical significance was determined by one-way ANOVA test, and it was two-sided and adjustments were made for multiple comparisons (**b, c, d**). The experiments for **b, c** were repeated three times independently with similar results. Source data are provided as a Source Data file. QFN, Quercetin-ferrum nanoparticles; QFN<sub>717</sub>, QFN loaded with SR-717; PLGA<sub>717</sub>, PLGA nanoparticles loaded with SR-717; nCSP, normal-Cholesterol cell membrane coated QFN<sub>717</sub>; CSP, low-Cholesterol membrane coated QFN<sub>717</sub>; nCISP, normal-Cholesterol cell membrane coated ICB agent and QFN<sub>717</sub>; CISP, low-Cholesterol membrane coated ICB agent and QFN<sub>717</sub>; CIP, low-Cholesterol membrane coated ICB agent and QFN.

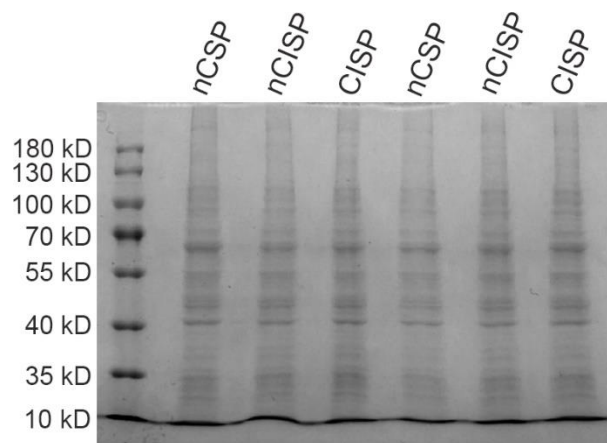

**Supplementary Figure 4. Coomassie brilliant blue staining of SDS-PAGE.** nCSP, nCISP and CISP with 20  $\mu\text{g}$  proteins were loaded into the SDS-PAGE. The experiments were repeated twice independently with similar results. Source data are provided as a Source Data file. QFN, Quercetin-ferrum nanoparticles; QFN<sub>717</sub>, QFN loaded with SR-717; nCSP, normal-Cholesterol cell membrane coated QFN<sub>717</sub>; nCISP, normal-Cholesterol cell membrane coated ICB agent and QFN<sub>717</sub>; CISP, low-Cholesterol membrane coated ICB agent and QFN<sub>717</sub>.

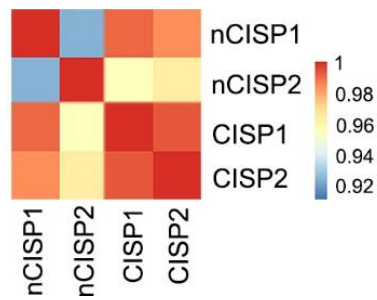

**Supplementary Figure 5. Protein expression difference in nCISP and CISP.** Label free quantitative proteomics technology was used to study the protein expression nCISP and CISP.  $n = 2$  independent samples. Source data are provided as a Source Data file. PLGA<sub>717</sub>, PLGA nanoparticles loaded with SR-717; nCISP, normal-Cholesterol cell membrane coated ICB agent and QFN<sub>717</sub>; CISP, low-Cholesterol membrane coated ICB agent and QFN<sub>717</sub>.

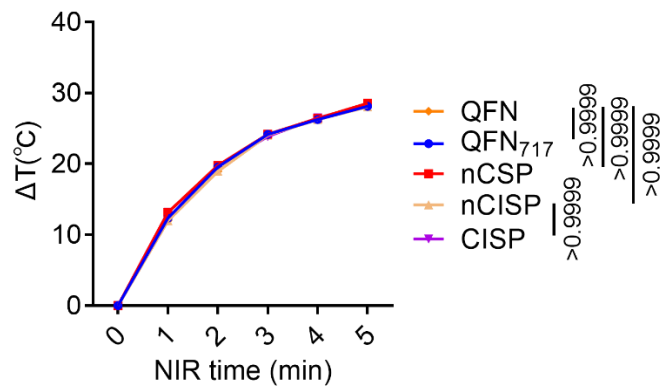

**Supplementary Figure 6. Temperature curves of QFN, QFN<sub>717</sub>, nCSP, nCISP and CISP treated with laser irradiation (1.0 W/cm<sup>2</sup>).** The concentration of QFN is 200 μg/mL in all groups. Data represent mean ± SEM, *n* = 3 independent samples. Statistical significance was determined by two-way ANOVA test, and it was two-sided and adjustments were made for multiple comparisons. Source data are provided as a Source Data file. QFN, Quercetin-ferrum nanoparticles; QFN<sub>717</sub>, QFN loaded with SR-717; nCSP, normal-Cholesterol cell membrane coated QFN<sub>717</sub>; nCISP, normal-Cholesterol cell membrane coated ICB agent and QFN<sub>717</sub>; CISP, low-Cholesterol membrane coated ICB agent and QFN<sub>717</sub>.

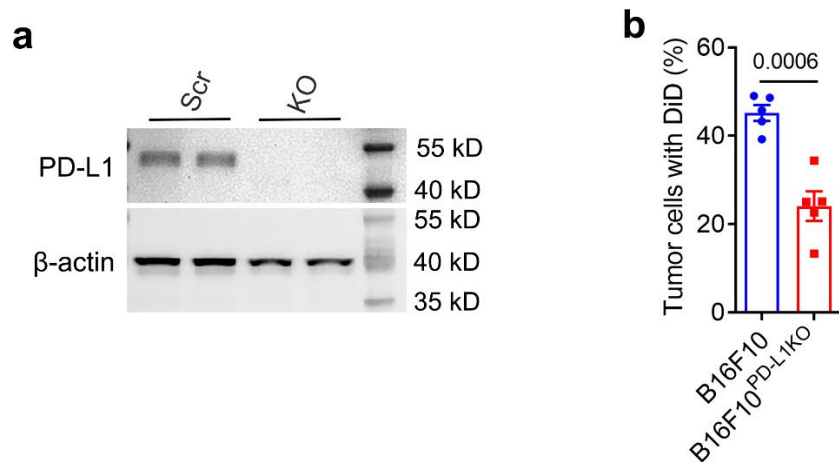

**Supplementary Figure 7. The uptake of CISP by B16F10<sup>PD-L1 KO</sup> cells.** **a** Western blot analysis of B16F10 cells transfected with Control Double Nickase Plasmid (Scramble, Scr), and PD-L1 Double Nickase Plasmids (KO). **b** The uptake of CISP by Scramble B16F10 cells and B16F10<sup>PD-L1 KO</sup> cells detected by flow-cytometry. Data represent mean  $\pm$  SEM,  $n = 5$  independent samples. Student's two-sided  $t$  test was used for the statistical analysis. The experiments for **a**, **b** were repeated three times independently with similar results. Source data are provided as a Source Data file.



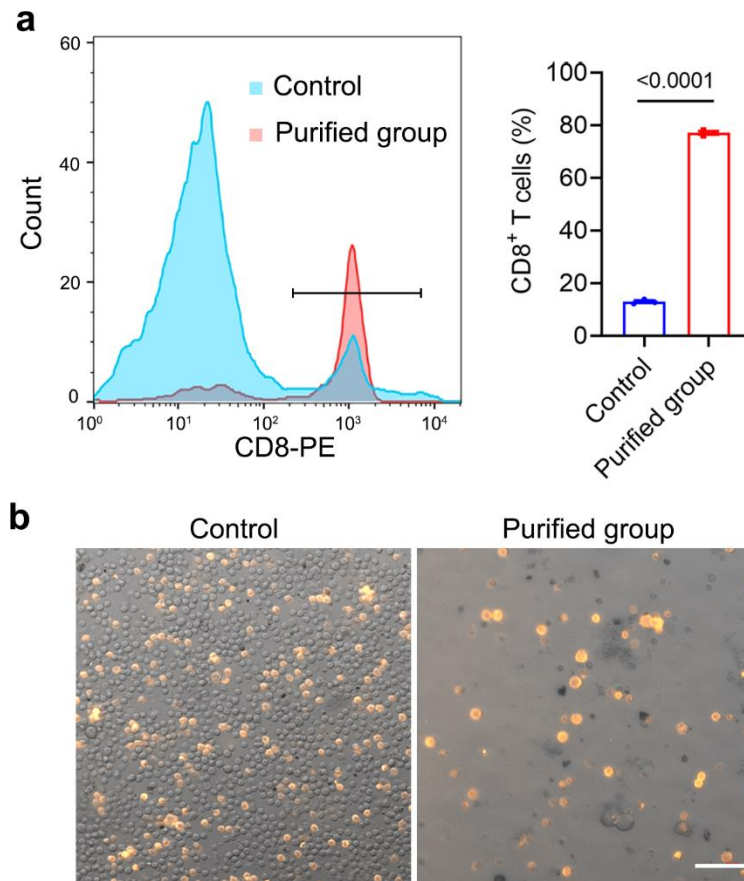

**Supplementary Figure 8. Characterization of purified CD8<sup>+</sup> T cells.** **a** Flow-cytometric analysis of CD8<sup>+</sup> T cells in splenocytes (Control) and purified splenocytes (Purified group). MojoSort™ Isolation Kits was used to isolate CD8<sup>+</sup> T cells in the spleens of mice. Data represent mean  $\pm$  SEM,  $n = 3$  independent samples. Student's two-sided  $t$  test was used for the statistical analysis. **b** Representative images of CD8<sup>+</sup> T cells (yellow) in splenocytes (Control) and purified splenocytes (Purified group).  $n = 3$  independent samples. Scale bar = 50  $\mu$ m. The experiments for **b** were repeated twice independently with similar results. Source data are provided as a Source Data file.

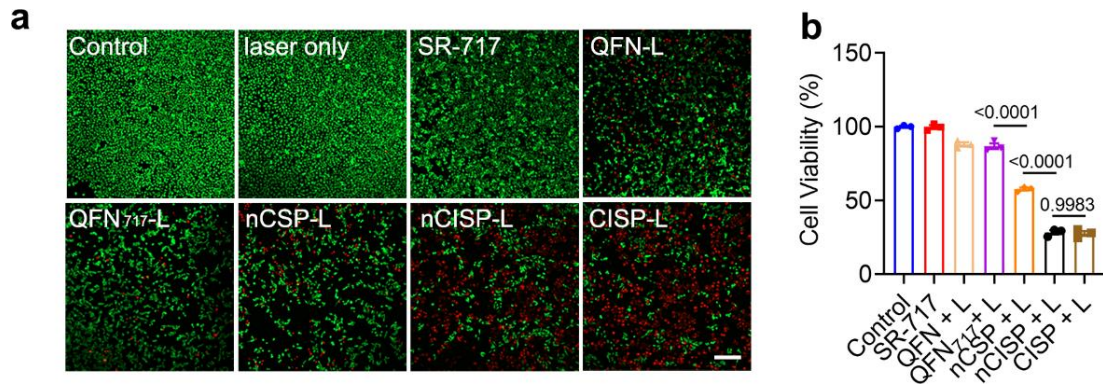

**Supplementary Figure 9. Cell viability of B16F10 cells.** **a** Representative images of B16F10 cells stained with fluorescein diacetate (green) and propidium iodide (red). B16F10 cells were incubated with CISP (the dosage of QFN is 30  $\mu\text{g/ml}$ ) for 8 h. Then cells were irradiated for 5 min (808 nm, 1.0  $\text{W/cm}^2$ ), and cell viability was examined at 1 h later. Scale bar = 150  $\mu\text{m}$ .  $n = 3$  independent samples. **b** B16F10 cells were treated with the indicated treatments, and cell viability was detected by CCK-8 kit. Data represent mean  $\pm$  SEM,  $n = 3$  independent samples. Statistical significance was determined by one-way ANOVA test, and it was two-sided and adjustments were made for multiple comparisons. The experiments for **a**, **b** were repeated three times independently with similar results. Source data are provided as a Source Data file. L, laser. QFN, Quercetin-ferrum nanoparticles; QFN<sub>717</sub>, QFN loaded with SR-717; nCSP, normal-Cholesterol cell membrane coated QFN<sub>717</sub>; nCISP, normal-Cholesterol cell membrane coated ICB agent and QFN<sub>717</sub>; CISP, low-Cholesterol membrane coated ICB agent and QFN<sub>717</sub>.

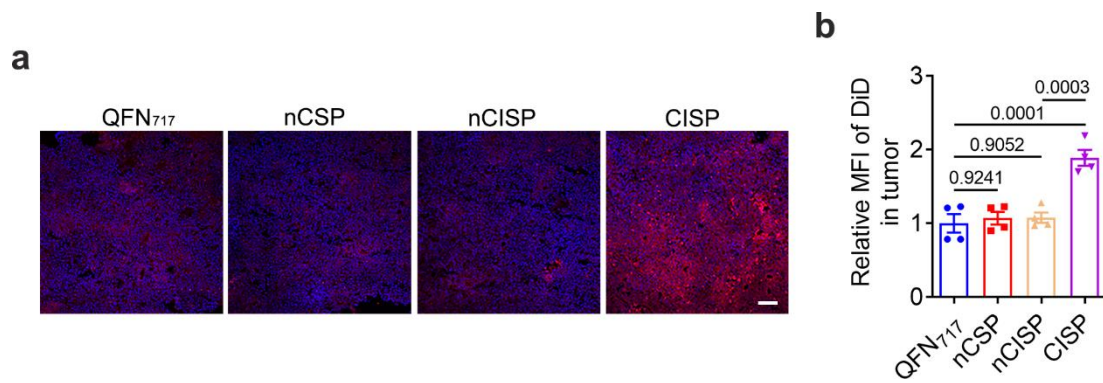

**Supplementary Figure 10. Biodistribution of QFN<sub>717</sub>, nCSP, nCISP and CISP in tumors. a, b** Representative images of nanoparticles (red) in tumors (**a**) and the relative mean fluorescence intensity (MFI) of DiD in tumors (**b**). Scale bar = 150  $\mu$ m. Mice bearing B16F10 melanoma were treated with QFN<sub>717</sub>, nCSP, nCISP and CISP (marked with DiD, 6  $\mu$ g/mouse, iv.), and mice were sacrificed at 6 h post injection. Data represent mean  $\pm$  SEM,  $n = 3$  mice. Statistical significance was determined by one-way ANOVA test, and it was two-sided and adjustments were made for multiple comparisons. The experiments for **a, b** were repeated three times independently with similar results. Source data are provided as a Source Data file. QFN, Quercetin-ferrum nanoparticles; QFN<sub>717</sub>, QFN loaded with SR-717; nCSP, normal-Cholesterol cell membrane coated QFN<sub>717</sub>; nCISP, normal-Cholesterol cell membrane coated ICB agent and QFN<sub>717</sub>; CISP, low-Cholesterol membrane coated ICB agent and QFN<sub>717</sub>.

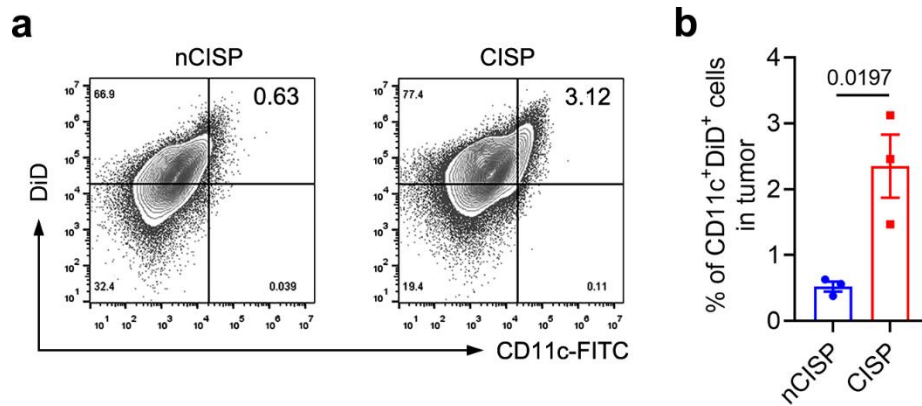

**Supplementary Figure 11. Flow-cytometric analysis of the uptake of nCISP and CISP by DCs in tumors. a, b** Representative flow cytometry plot (a) and the proportion of DiD<sup>+</sup> DCs in tumors (b). Mice bearing B16F10 melanoma were treated with nCISP and CISP (marked with DiD, 6  $\mu$ g/mouse, iv.), and cells in tumors were isolated at 6 h post injection. Cells were incubated with red blood cell lysis buffer and stained with CD11c-FITC. Data represent mean  $\pm$  SEM,  $n = 3$  mice. Student's two-sided  $t$  test was used for the statistical analysis. Source data are provided as a Source Data file. QFN, Quercetin-ferrum nanoparticles; QFN<sub>717</sub>, QFN loaded with SR-717; nCISP, normal-Cholesterol cell membrane coated ICB agent and QFN<sub>717</sub>; CISP, low-Cholesterol membrane coated ICB agent and QFN<sub>717</sub>; DCs, dendritic cells.

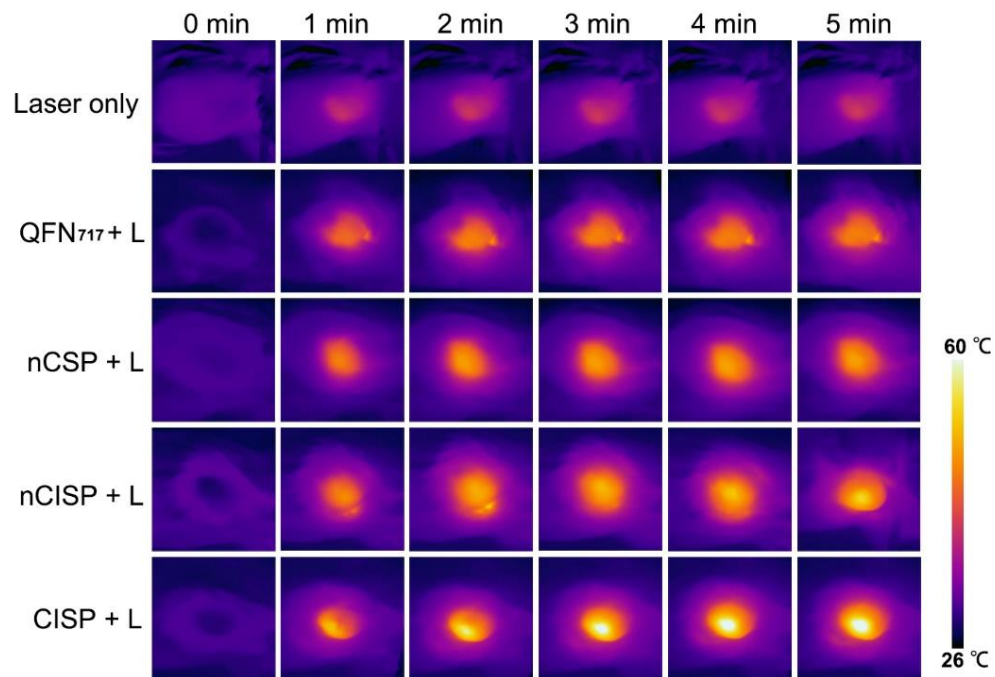

**Supplementary Figure 12. Representative infrared thermal images of mice.** Mice bearing B16F10 melanoma were treated with QFN<sub>717</sub>, nCSP, nCISP or CISP, and tumors were irradiated for 5 min with a near-infrared laser (808 nm, 1.0 W/cm<sup>2</sup>) at 12 h later.  $n = 3$  mice. The experiments were repeated twice independently with similar results. L, laser; QFN, Quercetin-ferrum nanoparticles; QFN<sub>717</sub>, QFN loaded with SR-717; nCSP, normal-Cholesterol cell membrane coated QFN<sub>717</sub>; nCISP, normal-Cholesterol cell membrane coated ICB agent and QFN<sub>717</sub>; CISP, low-Cholesterol membrane coated ICB agent and QFN<sub>717</sub>.

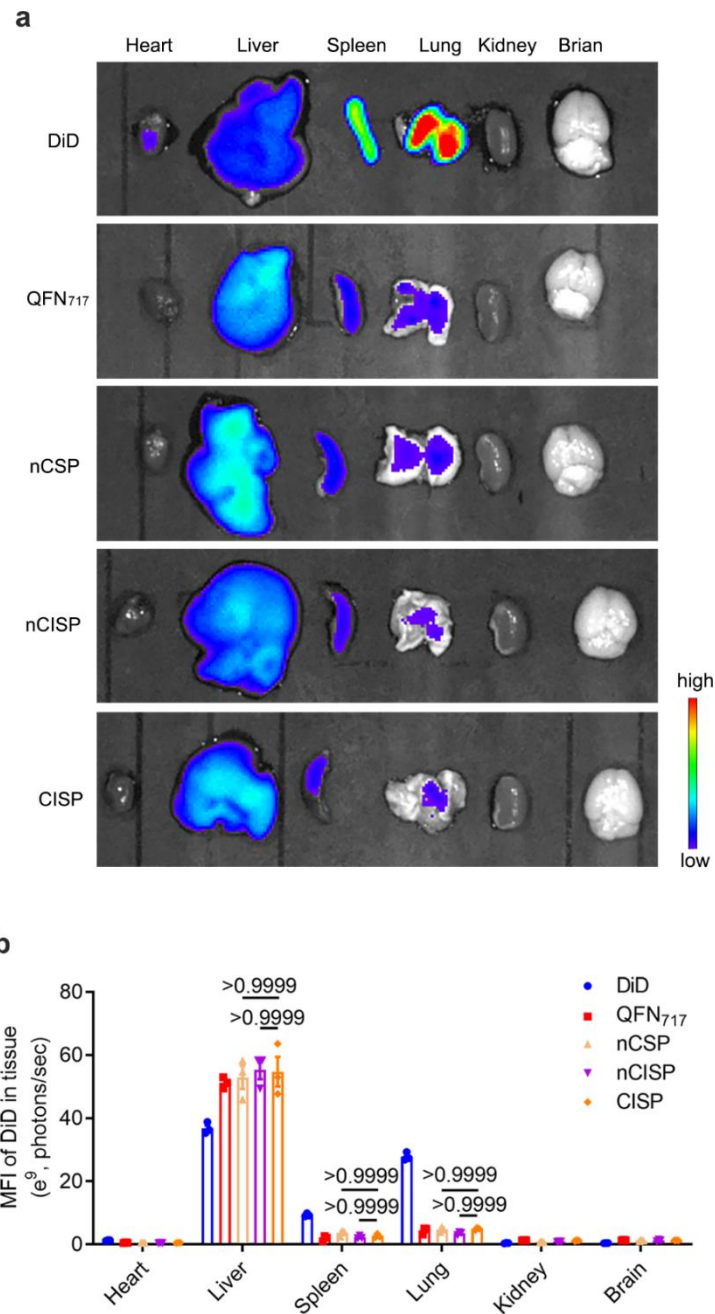

**Supplementary Figure 13. Biodistribution of DiD, QFN<sub>717</sub>, nCSP, nCISP and CISP in the major organs.** **a, b** Representative fluorescence images of the major organs (**a**) and the mean fluorescence intensity (MFI) of DiD in the major organs (**b**). Mice bearing B16F10 melanoma were treated with DiD, QFN<sub>717</sub>, nCSP, nCISP and CISP (marked with DiD, 6  $\mu\text{g}/\text{mouse}$ , iv.), and mice were sacrificed at 24 h post injection. Data represent mean  $\pm$  SEM,  $n = 3$  mice. Statistical significance was determined by one-way ANOVA test, and it was two-sided and adjustments were made for multiple comparisons. The experiments for **a, b** were repeated twice independently with similar results. Source data are provided as a Source Data file. QFN, Quercetin-ferrum nanoparticles; QFN<sub>717</sub>, QFN loaded with SR-717; nCSP, normal-Cholesterol cell membrane coated QFN<sub>717</sub>; nCISP, normal-Cholesterol cell membrane coated ICB agent and QFN<sub>717</sub>; CISP, low-Cholesterol membrane coated ICB agent and QFN<sub>717</sub>.

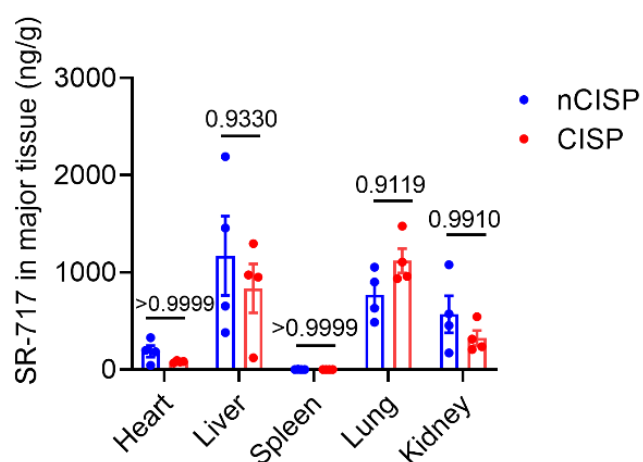

**Supplementary Figure 14. Concentration of SR-717 in the major organs.** Mice with B16F10 melanoma were treated with nCISP and CISP (10 mg/kg, iv.), and sacrificed at 8 h post injection. The concentration of SR-717 in the major organs was detected by LC-MS/MS. Data represent mean  $\pm$  SEM,  $n = 4$  mice. Statistical significance was determined by one-way ANOVA test, and it was two-sided and adjustments were made for multiple comparisons. Source data are provided as a Source Data file. QFN, Quercetin-ferrum nanoparticles; QFN<sub>717</sub>, QFN loaded with SR-717; nCISP, normal-Cholesterol cell membrane coated ICB agent and QFN<sub>717</sub>; CISP, low-Cholesterol membrane coated ICB agent and QFN<sub>717</sub>.

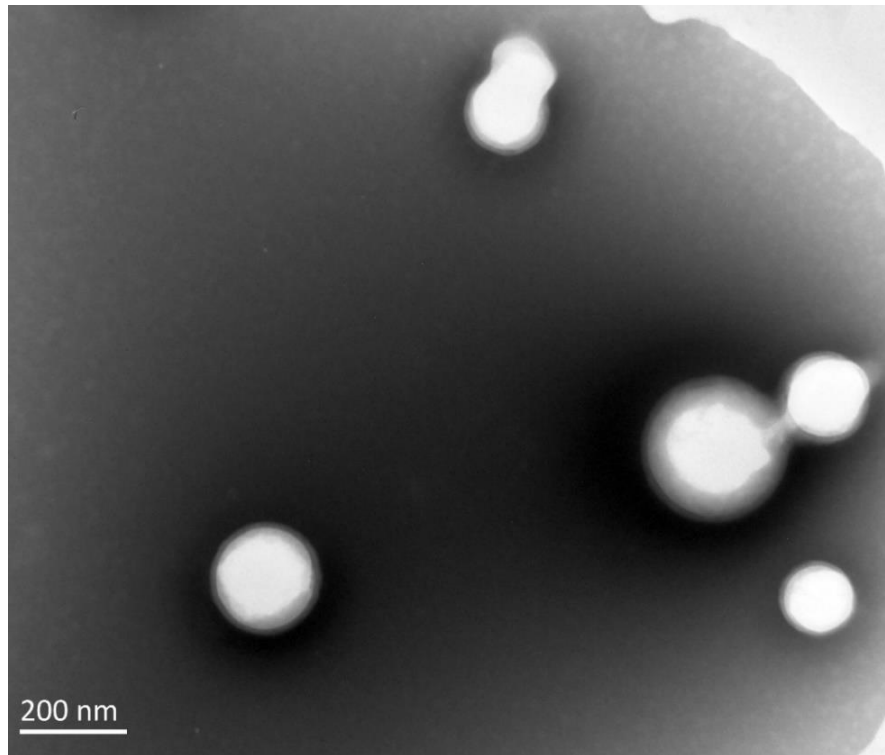

**Supplementary Figure 15. Representative TEM image of CSP.**  $n = 3$  independent samples. The experiments were repeated twice independently with similar results. QFN, Quercetin-ferrum nanoparticles; QFN<sub>717</sub>, QFN loaded with SR-717; CSP, low-Cholesterol membrane coated QFN<sub>717</sub>.



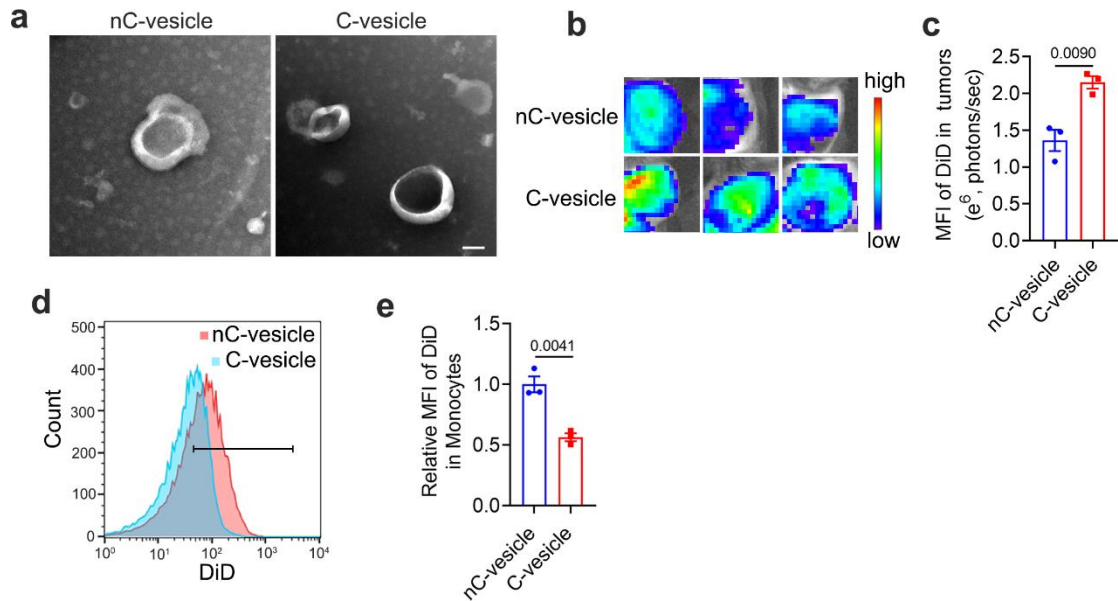

**Supplementary Figure 16. Tumor targeting ability of cell membrane vesicle.** **a** Representative TEM image of nC-vesicle (normal cell membrane vesicle sourced from CTLL2-PD1 cells) and C-vesicle (cell membrane vesicle sourced from CTLL2-PD1 cells that were treated with  $\beta$ -CD). Scale bar = 50 nm. **b, c** Fluorescence images of B16F10 melanoma at 6 h post injection of nC-vesicle and C-vesicle (1  $\mu$ g DiD/mouse, iv.) (**b**), and the mean fluorescence intensity (MFI) of DiD in tumors (**c**). Data represent mean  $\pm$  SEM,  $n = 3$  mice. **d, e** The uptake of C-vesicle and nC-vesicle by monocytes in the blood detected by flow cytometry at 0.5 h post injection (**d**) and the relative mean fluorescence intensity (MFI) of DiD in monocytes (**e**). Data represent mean  $\pm$  SEM,  $n = 3$  mice. Student's two-sided  $t$  test was used for the statistical analysis. The experiments for **a, d, e** were repeated three times independently with similar results. Source data are provided as a Source Data file.

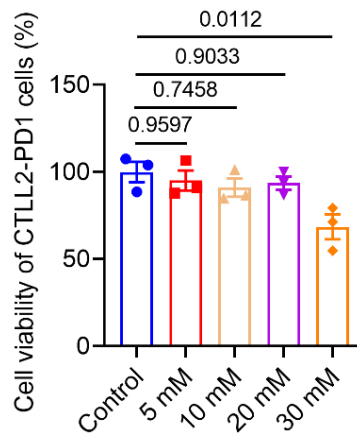

**Supplementary Figure 17. Viability of CTLL2-PD1 cells treated with  $\beta$ -CD.** Cells were washed with PBS once and incubated with different concentration of (2-hydroxypropyl)- $\beta$ -cyclodextrin (5 mM, 10 mM, 20 mM and 30 mM) for 30 min, and then washed with PBS once. Cell viability was detected by CCK-8 kit. Data represent mean  $\pm$  SEM,  $n = 3$  independent samples. Statistical significance was determined by one-way ANOVA test, and it was two-sided and adjustments were made for multiple comparisons. The experiments were repeated three times independently with similar results. Source data are provided as a Source Data file.

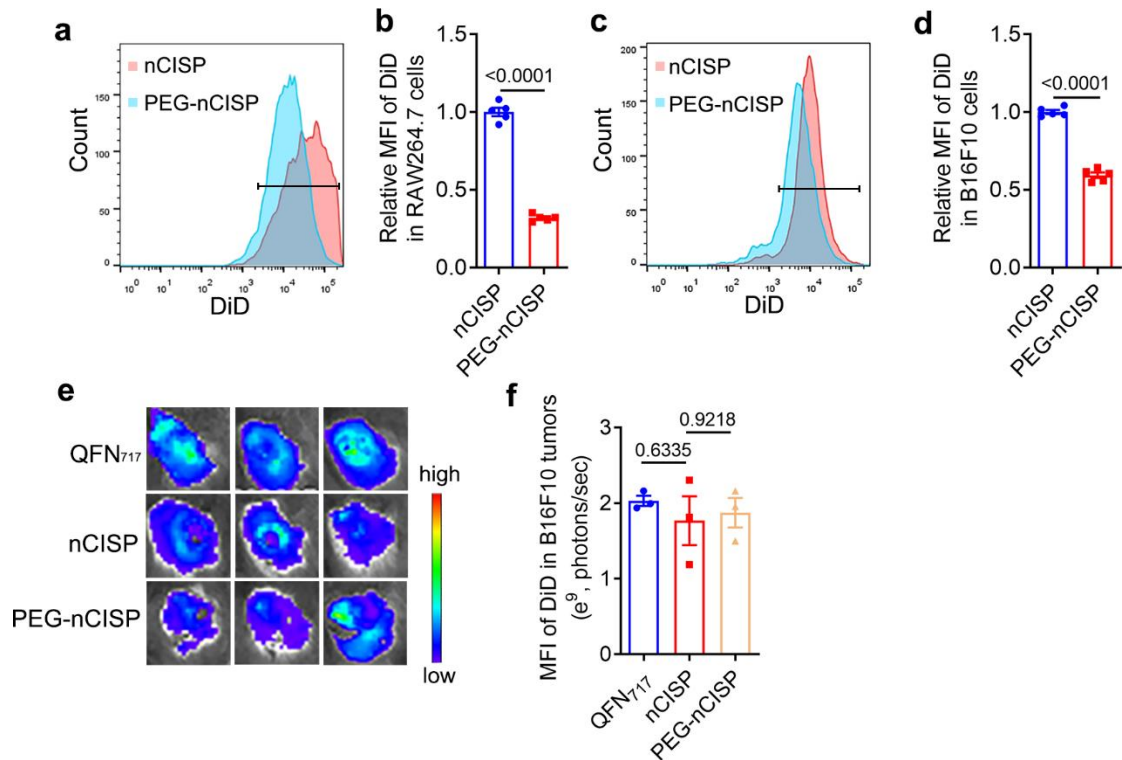

**Supplementary Figure 18. Tumor targeting ability of PEG-nCISP.** **a, b** The uptake of PEG-nCISP by RAW264.7 cells detected by flow-cytometry (**a**) and the mean fluorescence intensity (MFI) of DiD in RAW264.7 cells (**b**). Data represent mean  $\pm$  SEM,  $n = 5$  independent samples. **c, d** The uptake of PEG-nCISP by B16F10 cells detected by flow-cytometry (**c**) and the mean fluorescence intensity of DiD in B16F10 cells (**d**). Data represent mean  $\pm$  SEM,  $n = 5$  independent samples. **e, f** Fluorescence images of B16F10 melanoma at 12 h post injection of QFN<sub>717</sub>, nCISP and PEG-nCISP (**e**), and the mean fluorescence intensity of DiD in tumors (**f**). Data represent mean  $\pm$  SEM,  $n = 3$  mice. Student's two-sided  $t$  test was used for the statistical analysis in **b, d**. Statistical significance was determined by one-way ANOVA test in **f**, and it was two-sided and adjustments were made for multiple comparisons. The experiments for **a, b, c, d** were repeated three times independently with similar results. The experiments for **e, f** were repeated twice independently with similar results. Source data are provided as a Source Data file. QFN, Quercetin-ferrum nanoparticles; QFN<sub>717</sub>, QFN loaded with SR-717; nCISP, normal-Cholesterol cell membrane coated ICB agent and QFN<sub>717</sub>; PEG-nCISP, normal-Cholesterol cell membrane with PEG coated ICB agent and QFN<sub>717</sub>.

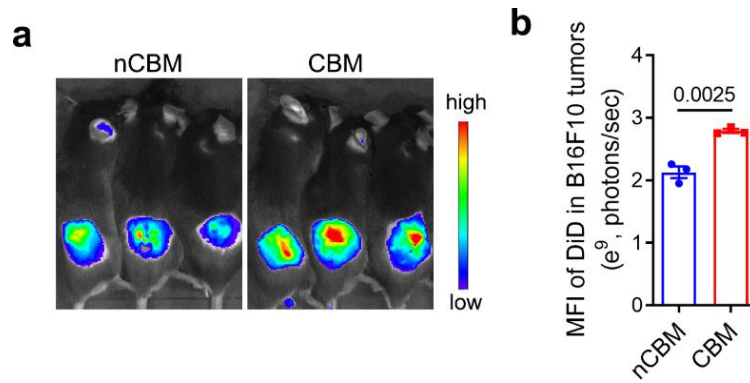

**Supplementary Figure 19. Tumor targeting ability of CBM.** **a, b** Fluorescence images of B16F10 melanoma at 12 h post injection of nCBM and CBM (**a**), and the mean fluorescence intensity (MFI) of DiD in tumors (**b**). Data represent mean  $\pm$  SEM,  $n = 3$  mice. Student's two-sided  $t$  test was used for the statistical analysis in **b**. The experiments were repeated three times independently with similar results. Source data are provided as a Source Data file. CBM, low-Cholesterol cell membrane sourced from B16F10 cells coated PLGA nanoparticles; nCBM, normal-Cholesterol cell membrane sourced from B16F10 cells coated PLGA nanoparticles.

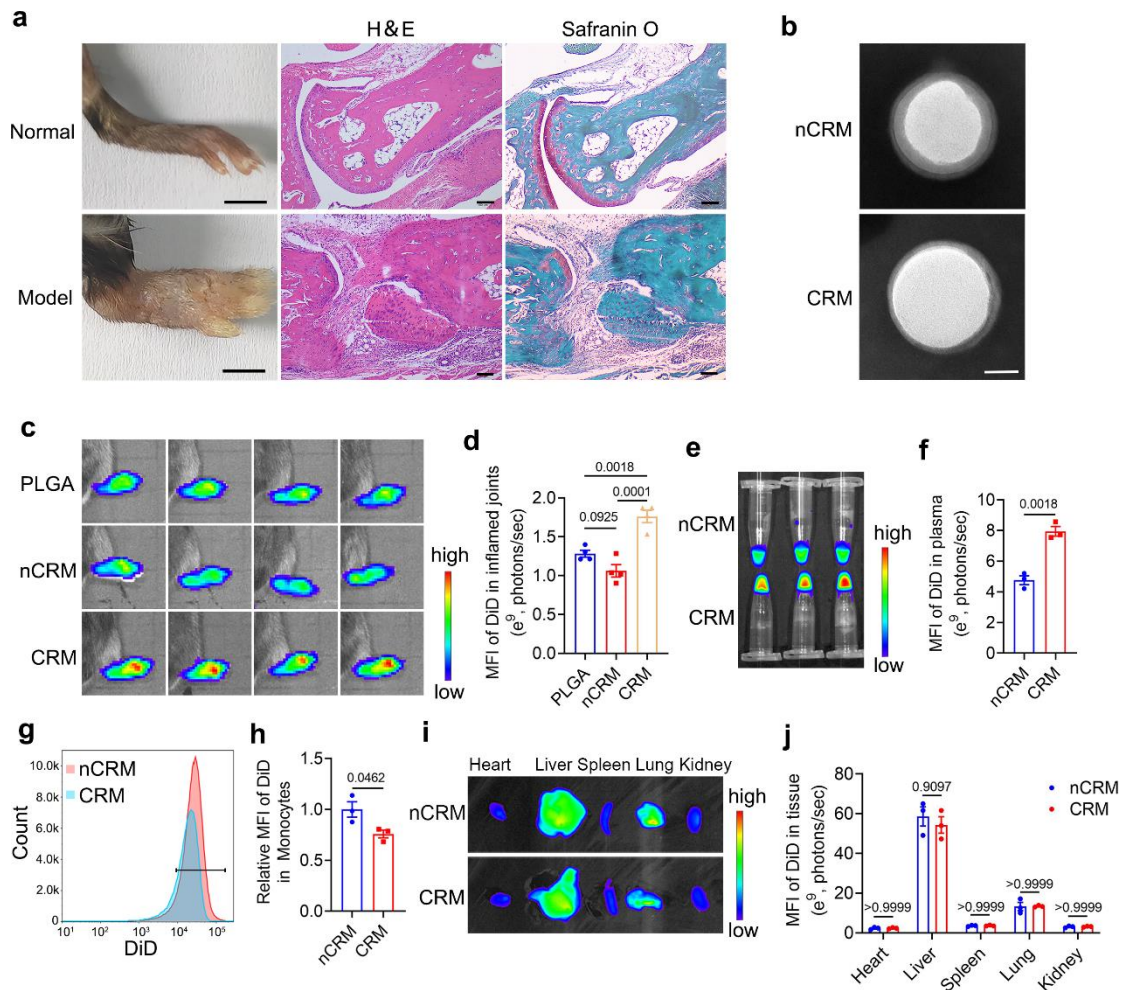

**Supplementary Figure 20. Targeting ability of CRM in an arthritis model. a** Representative image of ankle joints (Scale bar = 0.3 cm), H&E (Scale bar = 100  $\mu$ m) and Safranin-O and toluidine blue staining of ankle joints (Scale bar = 100  $\mu$ m).  $n = 3$  mice. **b** Representative TEM images of nCRM and CRM. Scale bar = 50 nm.  $n = 3$  independent samples. **c, d** Fluorescence images of model ankle joints at 6 h post injection of nCRM and CRM (**c**), and the mean fluorescence intensity (MFI) of DiD in model ankle joints (**d**). Data represent mean  $\pm$  SEM,  $n = 4$  mice. **e, f** Fluorescence images of plasma at 0.5 h post injection of particles (**e**), and the mean fluorescence intensity of DiD in the plasma (**f**). Data represent mean  $\pm$  SEM,  $n = 3$  mice. **g, h** The uptake of nCRM and CRM by monocytes in the blood detected by flow-cytometry (**g**), and the relative mean fluorescence intensity of DiD in monocytes (**h**). Data represent mean  $\pm$  SEM,  $n = 3$  mice. **i, j** Representative fluorescence images of major organs at 0.5 h post injection of nCRM and CRM (**i**), and the mean fluorescence intensity of DiD in the major organs (**j**). Data represent mean  $\pm$  SEM,  $n = 3$  mice. Student's two-sided  $t$  test was used for the statistical analysis in **d, f, h**. Statistical significance was determined by one-way ANOVA test in **j**, and it was two-sided and adjustments were made for multiple comparisons. The experiments for **b, g, h** were repeated three times independently with similar results. The experiments for **a** were repeated twice independently with similar results. Source data are provided as a Source Data file. nCRM, normal-Cholesterol cell membrane sourced from RAW264.7 cells coated

PLGA nanoparticles. CRM, low-Cholesterol cell membrane sourced from RAW264.7 cells coated PLGA nanoparticles.

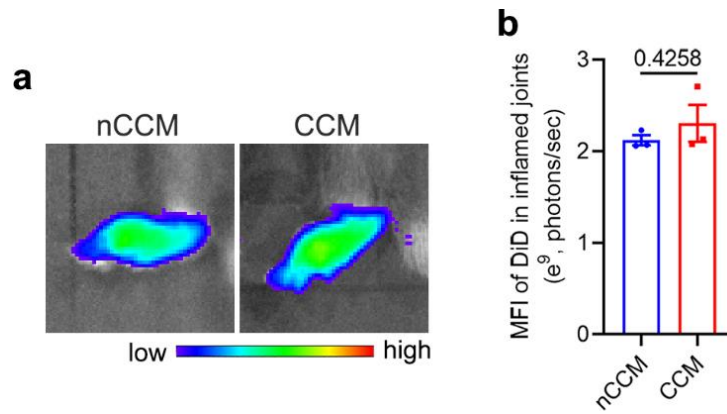

**Supplementary Figure 21. Targeting ability of CCM in an arthritis model. a, b** Fluorescence images of ankle joints at 6 h post injection of nCCM and CCM (**a**), and the mean fluorescence intensity (MFI) of DiD in ankle joints with arthritis (**b**). Data represent mean  $\pm$  SEM,  $n = 3$  mice. Student's two-sided  $t$  test was used for the statistical analysis in **b**. The experiments were repeated twice independently with similar results. Source data are provided as a Source Data file. nCCM, normal-Cholesterol cell membrane sourced from CTLL2-PD1 cells coated PLGA nanoparticles. CCM, low-Cholesterol cell membrane sourced from CTLL2-PD1 cells coated PLGA nanoparticles.

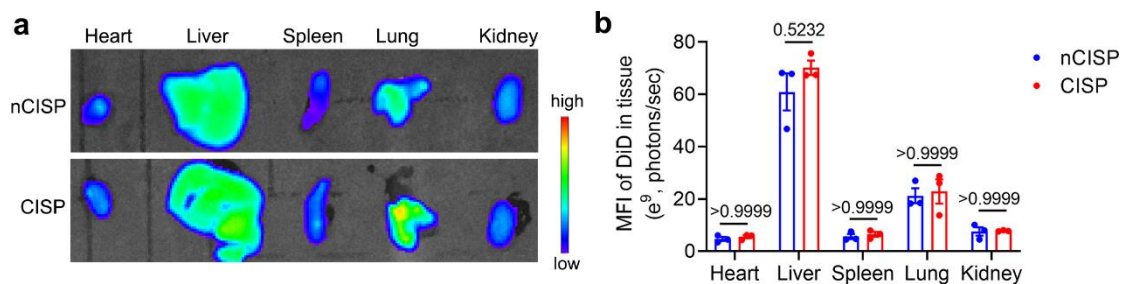

**Supplementary Figure 22. Biodistribution of nCISP and CISP in the major organs at 0.5 h post injection.** **a, b** Representative fluorescence images of major organs in mice (**a**), and the mean fluorescence intensity (MFI) of DiD in the major organs (**b**). Data represent mean  $\pm$  SEM,  $n = 3$  mice. Statistical significance was determined by one-way ANOVA test in **b**, and it was two-sided and adjustments were made for multiple comparisons. Source data are provided as a Source Data file. QFN, Quercetin-ferrum nanoparticles; QFN<sub>717</sub>, QFN loaded with SR-717; nCISP, normal-Cholesterol cell membrane coated ICB agent and QFN<sub>717</sub>; CISP, low-Cholesterol membrane coated ICB agent and QFN<sub>717</sub>.



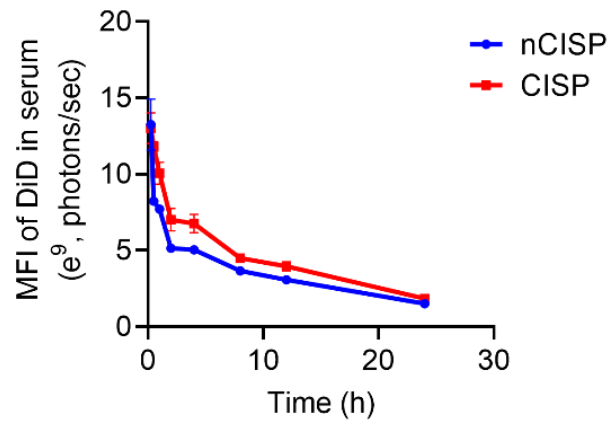

**Supplementary Figure 23. Semi-quantitative analysis of nCISP and CISP in serum.** Mice bearing B16F10 melanoma were treated with nCISP and CISP (marked with DiD), and sacrificed at different time points to isolate serum. The semi-quantitative analysis of nanoparticles in serum is based on the fluorescence images. Data represent mean  $\pm$  SEM,  $n = 3$  mice. Source data are provided as a Source Data file. QFN, Quercetin-ferrum nanoparticles; QFN<sub>717</sub>, QFN loaded with SR-717; nCISP, normal-Cholesterol cell membrane coated ICB agent and QFN<sub>717</sub>; CISP, low-Cholesterol membrane coated ICB agent and QFN<sub>717</sub>.

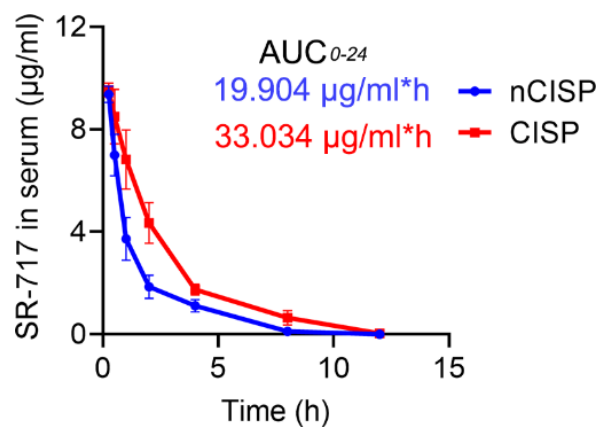

**Supplementary Figure 24. Concentration of SR-717 in serum.** Mice with B16F10 melanoma were treated with nCISP and CISP (10 mg/kg, iv.) and sacrificed at 0.25 h, 0.5 h, 2 h, 4 h, 8 h and 12 h. The concentration of SR-717 in serum was detected by LC-MS/MS. Data represent mean  $\pm$  SEM,  $n = 5$  mice. Source data are provided as a Source Data file. QFN, Quercetin-ferrum nanoparticles; QFN<sub>717</sub>, QFN loaded with SR-717; nCISP, normal-Cholesterol cell membrane coated ICB agent and QFN<sub>717</sub>; CISP, low-Cholesterol membrane coated ICB agent and QFN<sub>717</sub>.

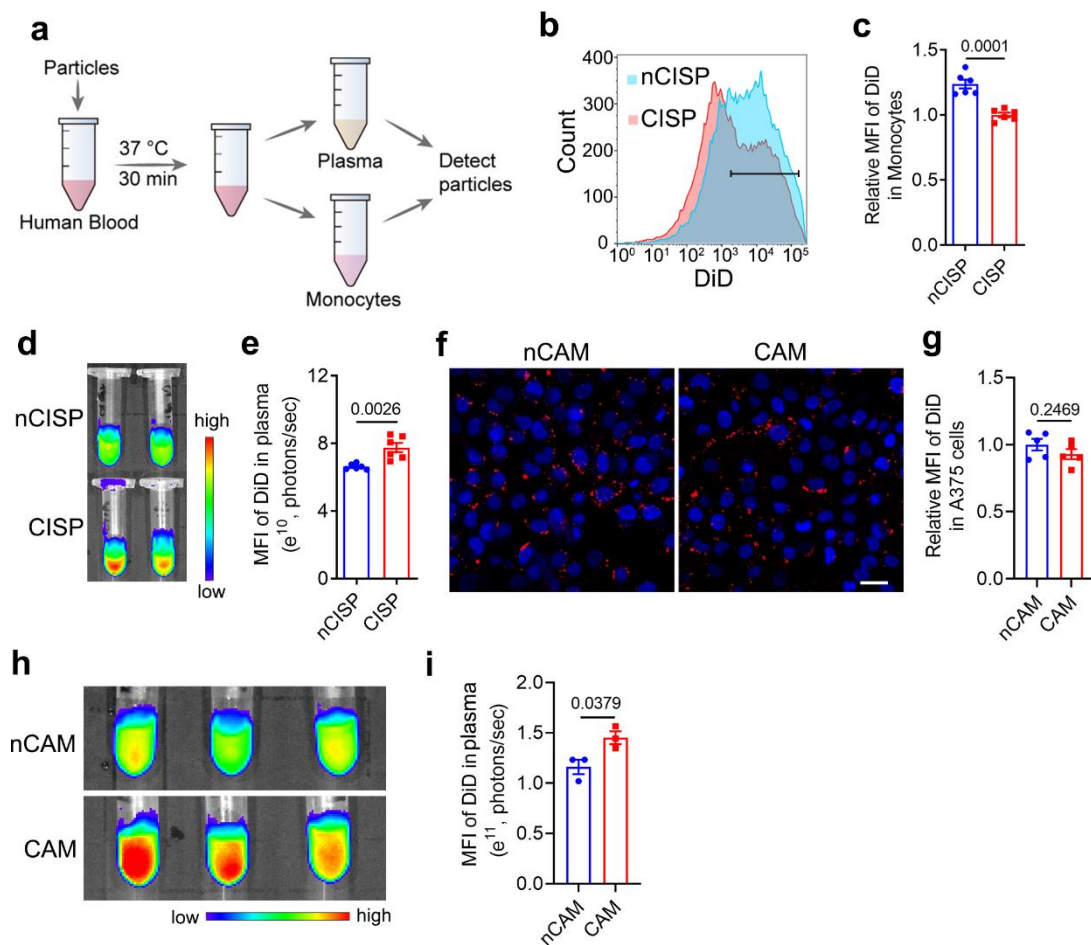

**Supplementary Figure 25. Uptake of nanoparticles by monocytes in human blood.** **a** Schematic illustration showing the process to detect CISP in human blood. **b, c** Uptake of nCISP and CISP by monocytes in human blood detected by flow-cytometry (**b**) and the relative mean fluorescence intensity (MFI) of DiD in monocytes (**c**). Data represent mean  $\pm$  SEM,  $n = 6$  independent samples. **d, e** Representative fluorescence images of plasma (**d**) and MFI of DiD in plasma (**e**). Data represent mean  $\pm$  SEM,  $n = 6$  independent samples. **f, g** Representative fluorescence images of A375 cells treated with nCAM and CAM (Red) (**f**), and the relative MFI of DiD in cells (**g**). Scale bar = 20  $\mu$ m. Data represent mean  $\pm$  SEM,  $n = 5$  independent samples. **h, i** Fluorescence images of plasma at 0.5 h post incubation (**h**), and MFI of DiD in plasma (**i**). Data represent mean  $\pm$  SEM,  $n = 3$  independent samples. Student's two-sided  $t$  test was used for the statistical analysis in **c, e, g, i**. The experiments for **b, c, d, e, f, g** were repeated twice independently with similar results. Source data are provided as a Source Data file. QFN, Quercetin-ferrum nanoparticles; QFN<sub>717</sub>, QFN loaded with SR-717; nCISP, normal-Cholesterol cell membrane coated ICB agent and QFN<sub>717</sub>; CISP, low-Cholesterol membrane coated ICB agent and QFN<sub>717</sub>; nCAM, normal-Cholesterol cell membrane sourced from A375 cells coated PLGA nanoparticles. CAM, low-Cholesterol cell membrane sourced from A375 cells coated PLGA nanoparticles.

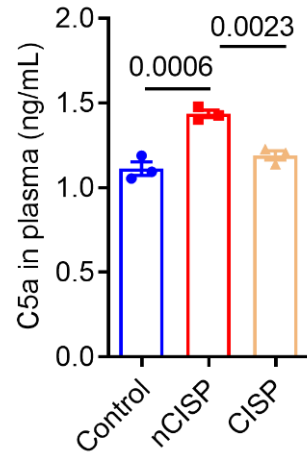

**Supplementary Figure 26. Concentration of C5a in plasma.** Mice with B16F10 melanoma were treated with nCISP and CISP (10 mg/kg), and the plasma was collected to detect C5a at 0.5 h post injection. Data represent mean  $\pm$  SEM,  $n = 3$  mice. Statistical significance was determined by one-way ANOVA test, and it was two-sided and adjustments were made for multiple comparisons. Source data are provided as a Source Data file. QFN, Quercetin-ferrum nanoparticles; QFN<sub>717</sub>, QFN loaded with SR-717; nCISP, normal-Cholesterol cell membrane coated ICB agent and QFN<sub>717</sub>; CISP, low-Cholesterol membrane coated ICB agent and QFN<sub>717</sub>.

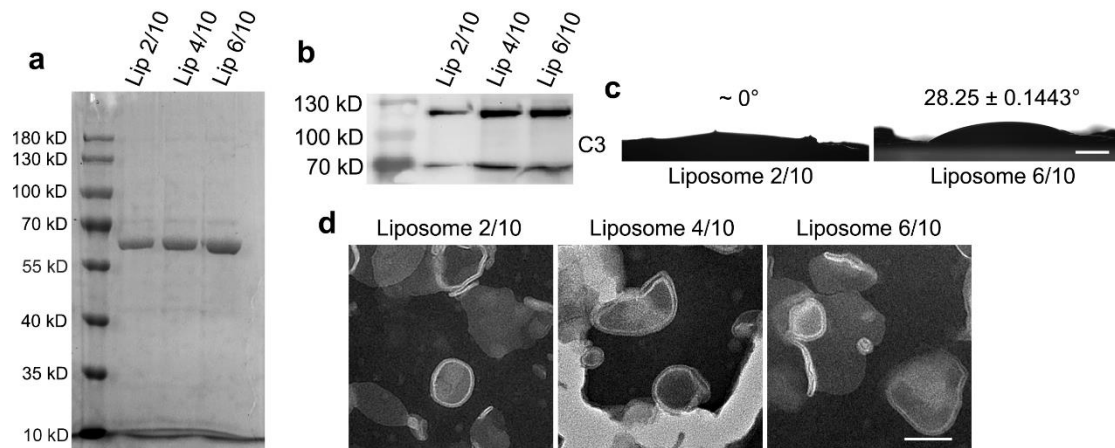

**Supplementary Figure 27. Characterization of liposomes.** **a** Images of coomassie brilliant blue staining of SDS-PAGE gel. Liposomes (0.5 mg/mL) with different content of cholesterol were incubated with serum of mice, and the protein absorbed on them were assessed then. **b** Western blot analysis of complement C3 absorbed on liposomes. **c** Water contact angle of Liposome 2/10 and Liposome 6/10 at 0.08s. Data represent mean  $\pm$  SEM,  $n = 3$  independent samples. **d** TEM images of Liposome 2/10, Liposome 4/10 and Liposome 6/10. Scale bar = 100 nm. The experiments for **a**, **b**, **c**, **d** were repeated twice independently with similar results. Lip 2/10, liposomes made from cholesterol (2 mg) and phospholipids (10 mg); Lip 4/10, liposomes made from cholesterol (4 mg) and phospholipids (10 mg); Lip 6/10, liposomes made from cholesterol (6 mg) and phospholipids (10 mg).

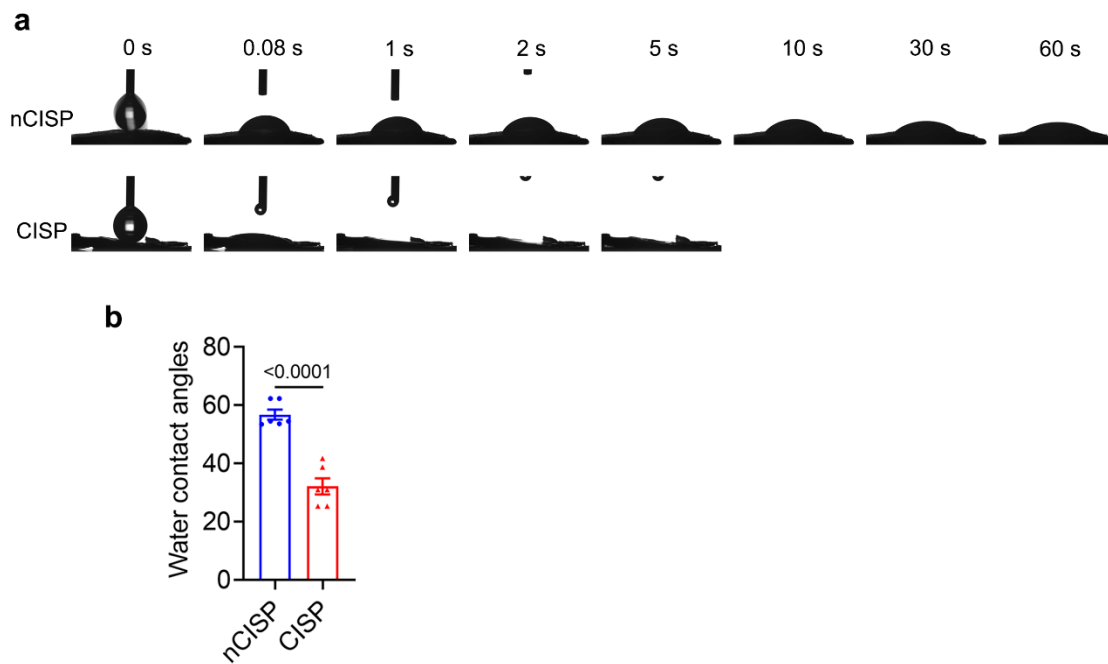

**Supplementary Figure 28. Water contact angle of nCISP and CISP tableting on glass slices. a, b** Representative images are shown in (a), and water contact angle of nCISP and CISP at 0.08 s are shown in (b). Data represent mean  $\pm$  SEM,  $n = 6$  independent samples. Student's two-sided  $t$  test was used for the statistical analysis in b. The experiments were repeated twice independently with similar results. Source data are provided as a Source Data file. QFN, Quercetin-ferrum nanoparticles; QFN<sub>717</sub>, QFN loaded with SR-717; nCISP, normal-Cholesterol cell membrane coated ICB agent and QFN<sub>717</sub>; CISP, low-Cholesterol membrane coated ICB agent and QFN<sub>717</sub>.

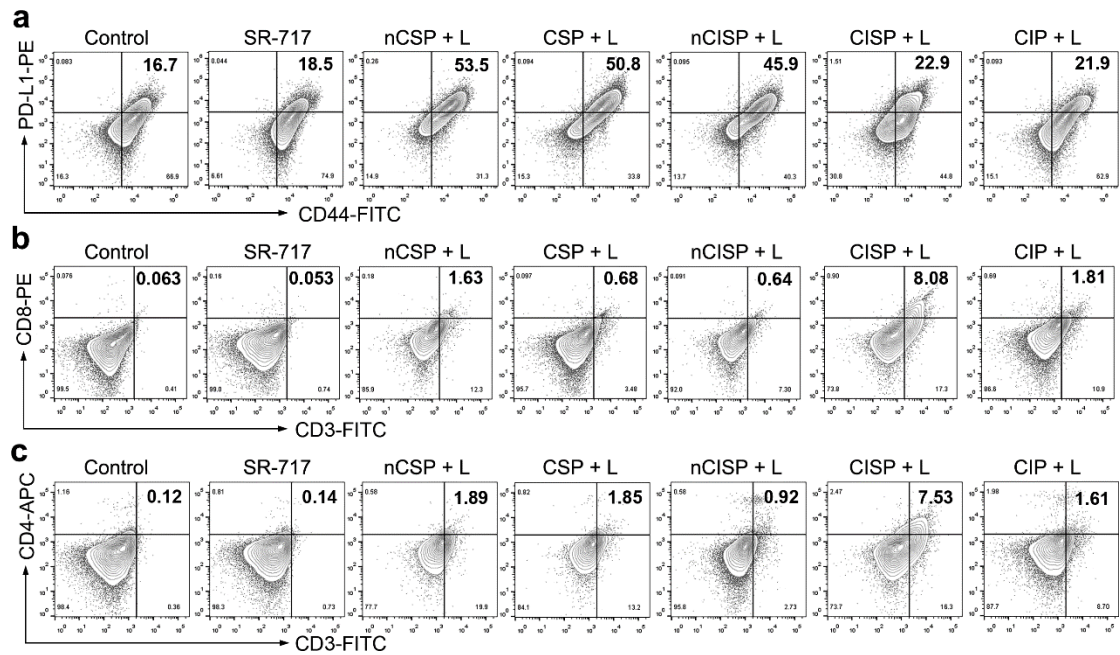

**Supplementary Figure 29. The anti-tumor immunity activation in B16F10 melanoma. a** Flow-cytometric analysis of CD44<sup>+</sup>PD-L1<sup>+</sup> cells in tumors at 6 days post laser irradiation. *n* = 4 mice. **b** Flow-cytometric analysis of CD3<sup>+</sup>CD8<sup>+</sup> cells in tumors at 6 days post laser irradiation. *n* = 4 mice. **c** Flow-cytometric analysis of CD3<sup>+</sup>CD4<sup>+</sup> cells in tumors at 6 days post laser irradiation. *n* = 4 mice. L, laser; QFN, Quercetin-ferrum nanoparticles; QFN<sub>717</sub>, QFN loaded with SR-717; nCSP, normal-Cholesterol cell membrane coated QFN<sub>717</sub>; CSP, low-Cholesterol membrane coated QFN<sub>717</sub>; nCISP, normal-Cholesterol cell membrane coated ICB agent and QFN<sub>717</sub>; CISP, low-Cholesterol membrane coated ICB agent and QFN<sub>717</sub>; CIP, low-Cholesterol membrane coated ICB agent and QFN.

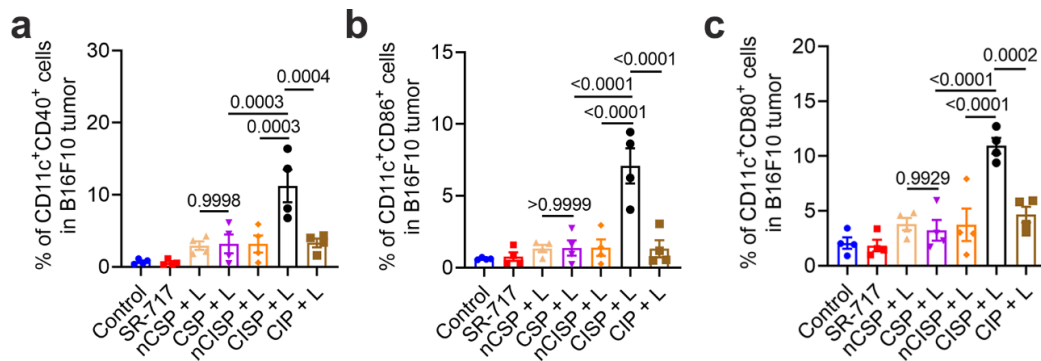

**Supplementary Figure 30. Maturation of DCs in B16F10 melanoma.** **a, b, c** Flow-cytometric analysis of CD11c<sup>+</sup>CD40<sup>+</sup> cells (**a**), CD11c<sup>+</sup>CD86<sup>+</sup> cells (**b**) and CD11c<sup>+</sup>CD80<sup>+</sup> cells (**c**) in B16F10 melanoma at 6 days post laser irradiation. Data represent mean  $\pm$  SEM,  $n = 4$  mice. Statistical significance was determined by one-way ANOVA test in **a, b, c**, and it was two-sided and adjustments were made for multiple comparisons. Source data are provided as a Source Data file. L, laser; QFN, Quercetin-ferrum nanoparticles; QFN<sub>717</sub>, QFN loaded with SR-717; nCSP, normal-Cholesterol cell membrane coated QFN<sub>717</sub>; CSP, low-Cholesterol membrane coated QFN<sub>717</sub>; nCISP, normal-Cholesterol cell membrane coated ICB agent and QFN<sub>717</sub>; CISP, low-Cholesterol membrane coated ICB agent and QFN<sub>717</sub>; CIP, low-Cholesterol membrane coated ICB agent and QFN.



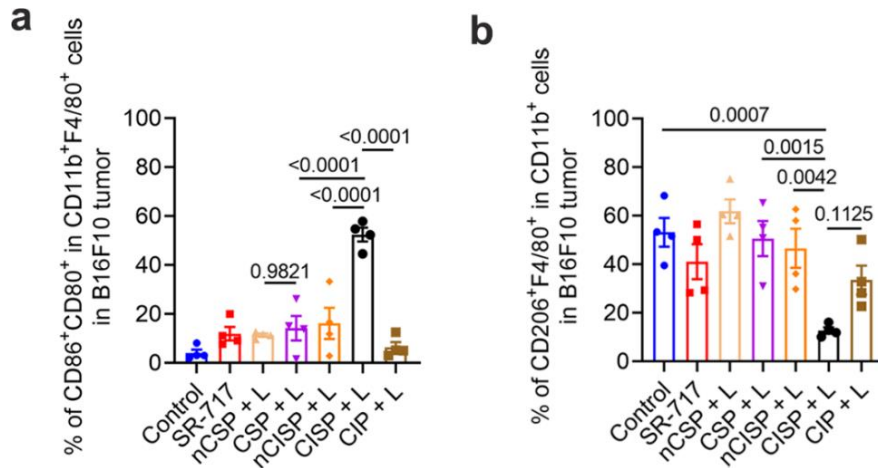

**Supplementary Figure 31. Macrophages in B16F10 melanoma.** **a** Flow-cytometric analysis of CD80<sup>+</sup>CD86<sup>+</sup> cells in CD11b<sup>+</sup>F4/80<sup>+</sup> cells (M1) in B16F10 melanoma at 6 days post laser irradiation. Data represent mean  $\pm$  SEM,  $n = 4$  mice. **b** Flow-cytometric analysis of CD206<sup>+</sup>F4/80<sup>+</sup> cells in CD11b<sup>+</sup> cells (M2) in B16F10 melanoma at 6 days post laser irradiation. Data represent mean  $\pm$  SEM,  $n = 4$  mice. Statistical significance was determined by one-way ANOVA test in **a**, **b**, and it was two-sided and adjustments were made for multiple comparisons. Source data are provided as a Source Data file. L, laser; QFN, Quercetin-ferrum nanoparticles; QFN<sub>717</sub>, QFN loaded with SR-717; nCSP, normal-Cholesterol cell membrane coated QFN<sub>717</sub>; CSP, low-Cholesterol membrane coated QFN<sub>717</sub>; nCISP, normal-Cholesterol cell membrane coated ICB agent and QFN<sub>717</sub>; CISP, low-Cholesterol membrane coated ICB agent and QFN<sub>717</sub>; CIP, low-Cholesterol membrane coated ICB agent and QFN.

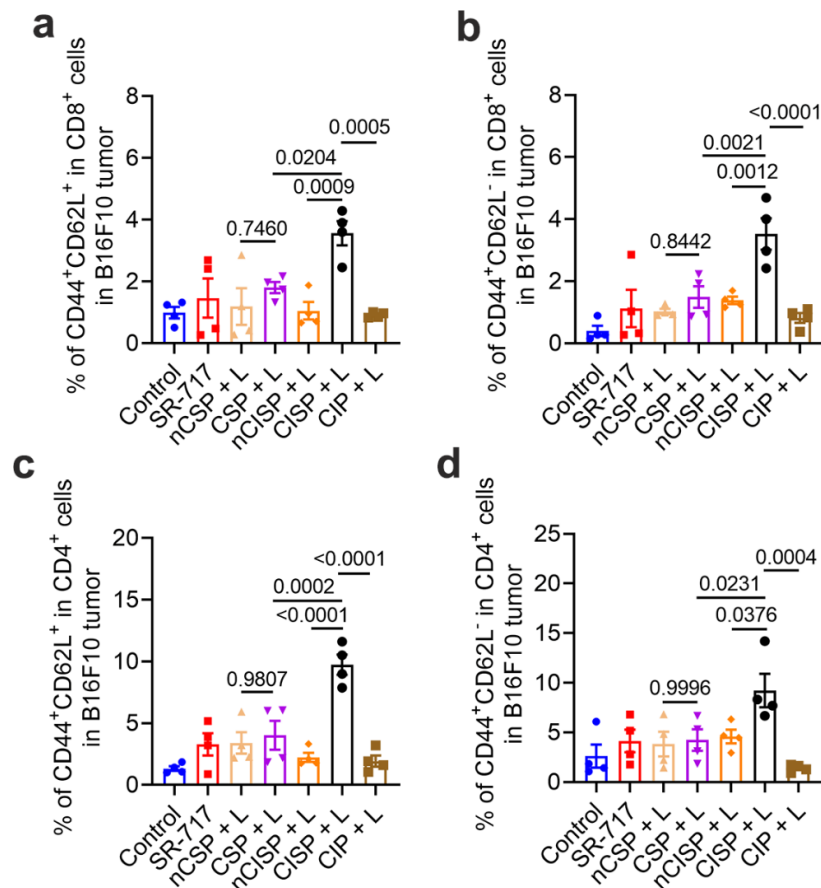

**Supplementary Figure 32. Memory T cells in B16F10 melanoma. a, b, c, d** Memory T cells including CD8<sup>+</sup>Tcm (a), CD8<sup>+</sup>Tem (b), CD4<sup>+</sup>Tcm (c) and CD4<sup>+</sup>Tem (d) in tumors were examined by flow cytometer. Tumors were harvested at 6 days post laser irradiation. Data represent mean  $\pm$  SEM,  $n = 4$  mice. Statistical significance was determined by one-way ANOVA test in a, b, c, d and it was two-sided and adjustments were made for multiple comparisons. Source data are provided as a Source Data file. L, laser; QFN, Quercetin-ferrum nanoparticles; QFN<sub>717</sub>, QFN loaded with SR-717; nCSP, normal-Cholesterol cell membrane coated QFN<sub>717</sub>; CSP, low-Cholesterol membrane coated QFN<sub>717</sub>; nCISP, normal-Cholesterol cell membrane coated ICB agent and QFN<sub>717</sub>; CISP, low-Cholesterol membrane coated ICB agent and QFN<sub>717</sub>; CIP, low-Cholesterol membrane coated ICB agent and QFN.

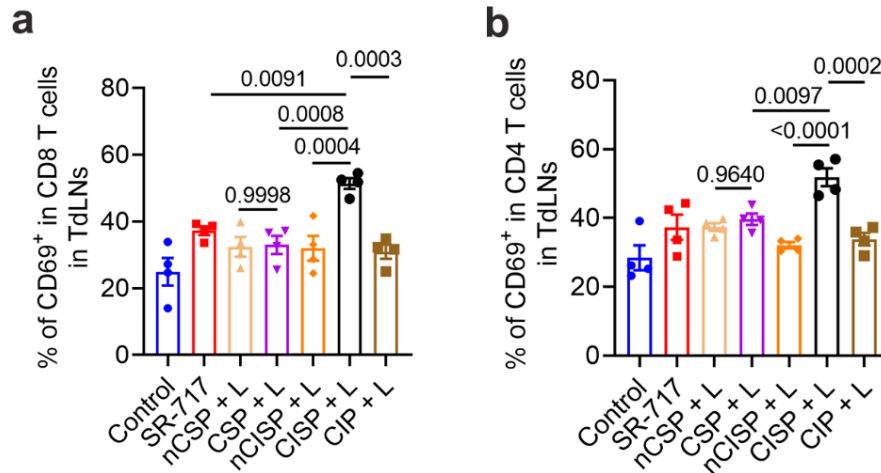

**Supplementary Figure 33. Activated T cells in TdLNs in mice bearing B16F10 melanoma.** **a** Flow-cytometric analysis of CD69<sup>+</sup> cells in CD3<sup>+</sup>CD8<sup>+</sup> cells in TdLNs at 6 days post laser irradiation. Data represent mean ± SEM, *n* = 4 mice. **b** Flow-cytometric analysis of CD69<sup>+</sup> cells in CD3<sup>+</sup>CD4<sup>+</sup> cells in TdLNs at 6 days post laser irradiation. Data represent mean ± SEM, *n* = 4 mice. Statistical significance was determined by one-way ANOVA test in **a**, **b** and it was two-sided and adjustments were made for multiple comparisons. Source data are provided as a Source Data file. L, laser, QFN, Quercetin-ferrum nanoparticles; QFN<sub>717</sub>, QFN loaded with SR-717; nCSP, normal-Cholesterol cell membrane coated QFN<sub>717</sub>; CSP, low-Cholesterol membrane coated QFN<sub>717</sub>; nCISP, normal-Cholesterol cell membrane coated ICB agent and QFN<sub>717</sub>; CISP, low-Cholesterol membrane coated ICB agent and QFN<sub>717</sub>; CIP, low-Cholesterol membrane coated ICB agent and QFN; TdLNs, Tumor draining lymph nodes.

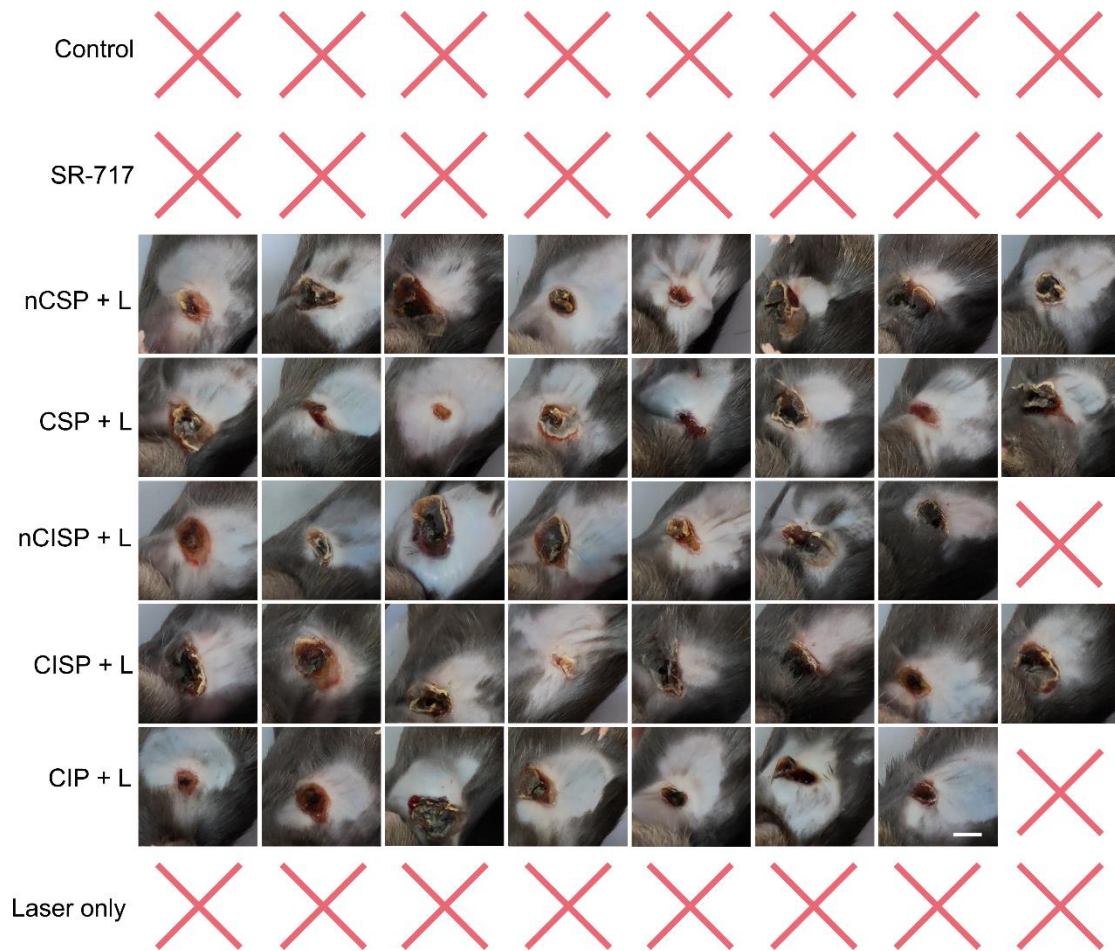

**Supplementary Figure 34. Images of melanoma in mice at 16 days post tumor inoculation.** Red cross line represents the dead mouse. Scale bar = 0.5 cm.  $n = 8$  mice. L, laser; QFN, Quercetin-ferrum nanoparticles; QFN<sub>717</sub>, QFN loaded with SR-717; nCSP, normal-Cholesterol cell membrane coated QFN<sub>717</sub>; CSP, low-Cholesterol membrane coated QFN<sub>717</sub>; nCISP, normal-Cholesterol cell membrane coated ICB agent and QFN<sub>717</sub>; CISP, low-Cholesterol membrane coated ICB agent and QFN<sub>717</sub>; CIP, low-Cholesterol membrane coated ICB agent and QFN.

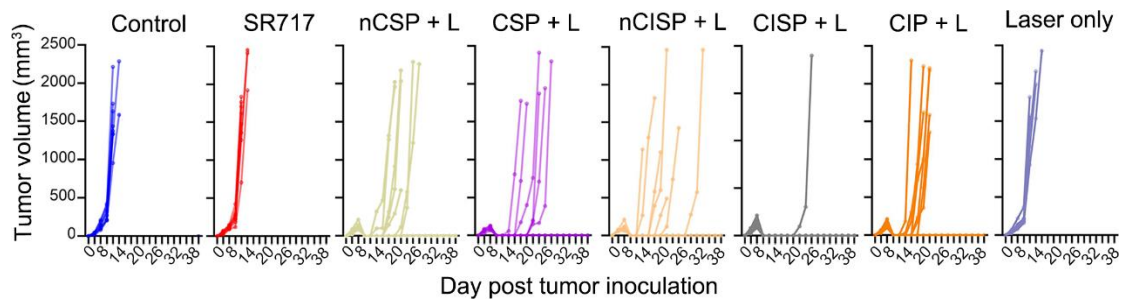

**Supplementary Figure 35. Tumor growth curve of mice bearing B16F10 melanoma.**  $n = 8$  mice. Source data are provided as a Source Data file. L, laser; QFN, Quercetin-ferrum nanoparticles; QFN<sub>717</sub>, QFN loaded with SR-717; nCSP, normal-Cholesterol cell membrane coated QFN<sub>717</sub>; CSP, low-Cholesterol membrane coated QFN<sub>717</sub>; nCISP, normal-Cholesterol cell membrane coated ICB agent and QFN<sub>717</sub>; CISP, low-Cholesterol membrane coated ICB agent and QFN<sub>717</sub>; CIP, low-Cholesterol membrane coated ICB agent and QFN.

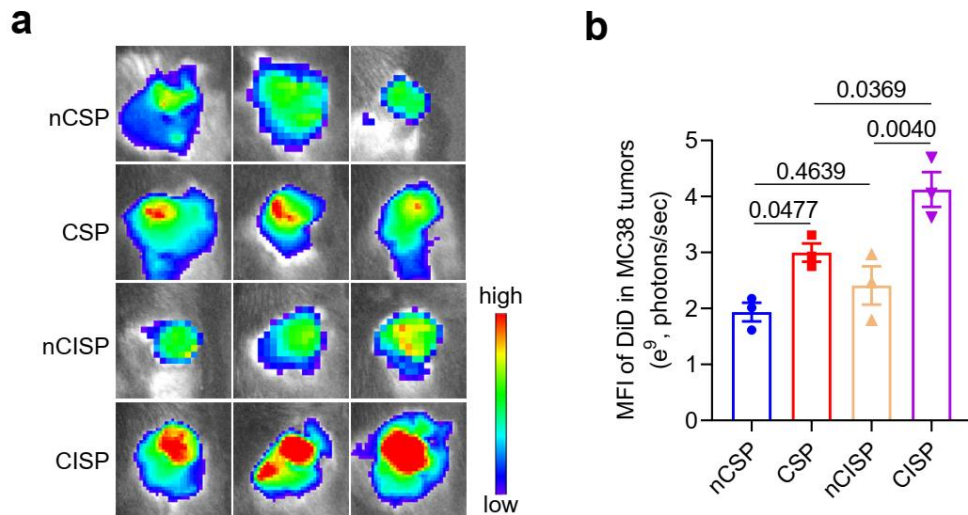

**Supplementary Figure 36. CISP targeted to MC38 tumors in mice. a, b** Fluorescence images of MC38 tumors at 6 h post treated with of nCSP, CSP, nCISP and CISP (**a**) and the mean fluorescence intensity (MFI) of DiD in tumors (**b**). Data represent mean  $\pm$  SEM,  $n = 3$  mice. The experiments were repeated twice independently with similar results. Statistical significance was determined by one-way ANOVA test in **b** and it was two-sided and adjustments were made for multiple comparisons. Source data are provided as a Source Data file. QFN, Quercetin-ferrum nanoparticles; QFN<sub>717</sub>, QFN loaded with SR-717; nCSP, normal-Cholesterol cell membrane coated QFN<sub>717</sub>; CSP, low-Cholesterol membrane coated QFN<sub>717</sub>; nCISP, normal-Cholesterol cell membrane coated ICB agent and QFN<sub>717</sub>; CISP, low-Cholesterol membrane coated ICB agent and QFN<sub>717</sub>.

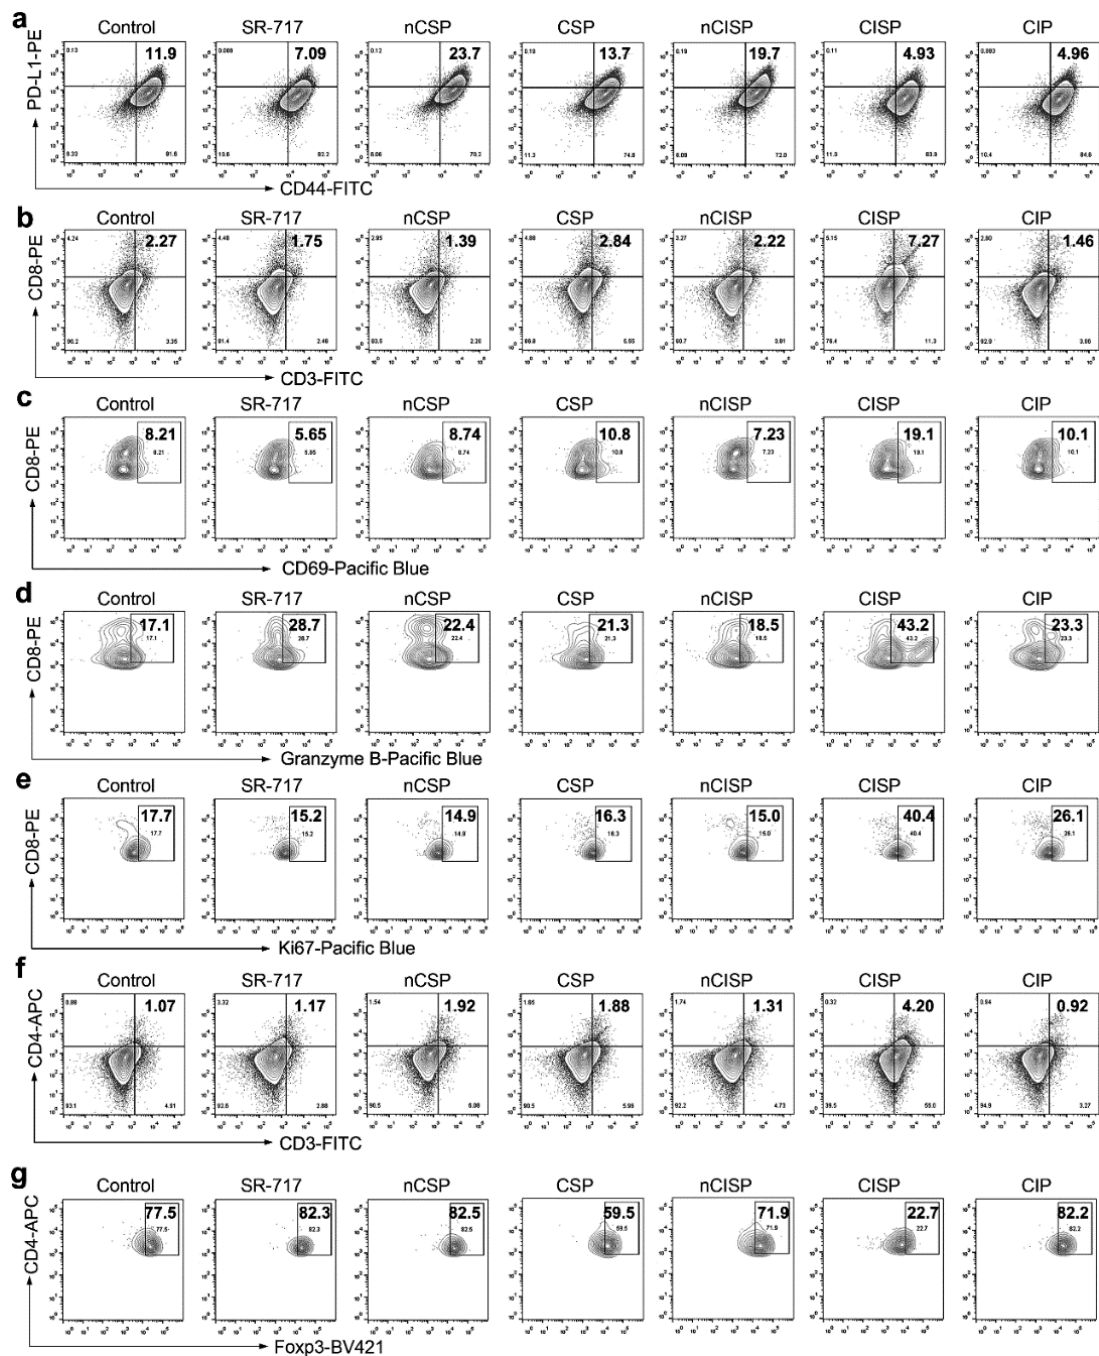

**Supplementary Figure 37. The anti-tumor immunity activation in MC38 tumors.**

**a** Flow-cytometric analysis of CD4<sup>+</sup>PD-L1<sup>+</sup> cells in MC38 tumors at 18 days post tumor inoculation. *n* = 4 mice. **b** Flow-cytometric analysis of CD3<sup>+</sup>CD8<sup>+</sup> cells in MC38 tumors at 18 days post tumor inoculation. *n* = 4 mice. **c** Flow-cytometric analysis of CD69<sup>+</sup> cells in CD8 T cells in MC38 tumors at 18 days post tumor inoculation. (*n* = 4 mice). **d** Flow-cytometric analysis of Granzyme B<sup>+</sup> cells in CD8 T cells in MC38 tumors at 18 days post tumor inoculation. *n* = 4 mice. **e** Flow-cytometric analysis of Ki67<sup>+</sup> cells in CD8 T cells in MC38 tumors at 18 days post tumor inoculation. *n* = 4 mice. **f** Flow-cytometric analysis of CD3<sup>+</sup>CD4<sup>+</sup> cells in MC38 tumors at 18 days post tumor inoculation. *n* = 4 mice. **g** Flow-cytometric analysis of Foxp3<sup>+</sup> cells in CD4 T cells in MC38 tumors at 18 days post tumor inoculation. *n* = 4 mice. QFN, Quercetin-

ferrum nanoparticles; QFN<sub>717</sub>, QFN loaded with SR-717; nCSP, normal-Cholesterol cell membrane coated QFN<sub>717</sub>; CSP, low-Cholesterol membrane coated QFN<sub>717</sub>; nCISP, normal-Cholesterol cell membrane coated ICB agent and QFN<sub>717</sub>; CISP, low-Cholesterol membrane coated ICB agent and QFN<sub>717</sub>; CIP, low-Cholesterol membrane coated ICB agent and QFN.



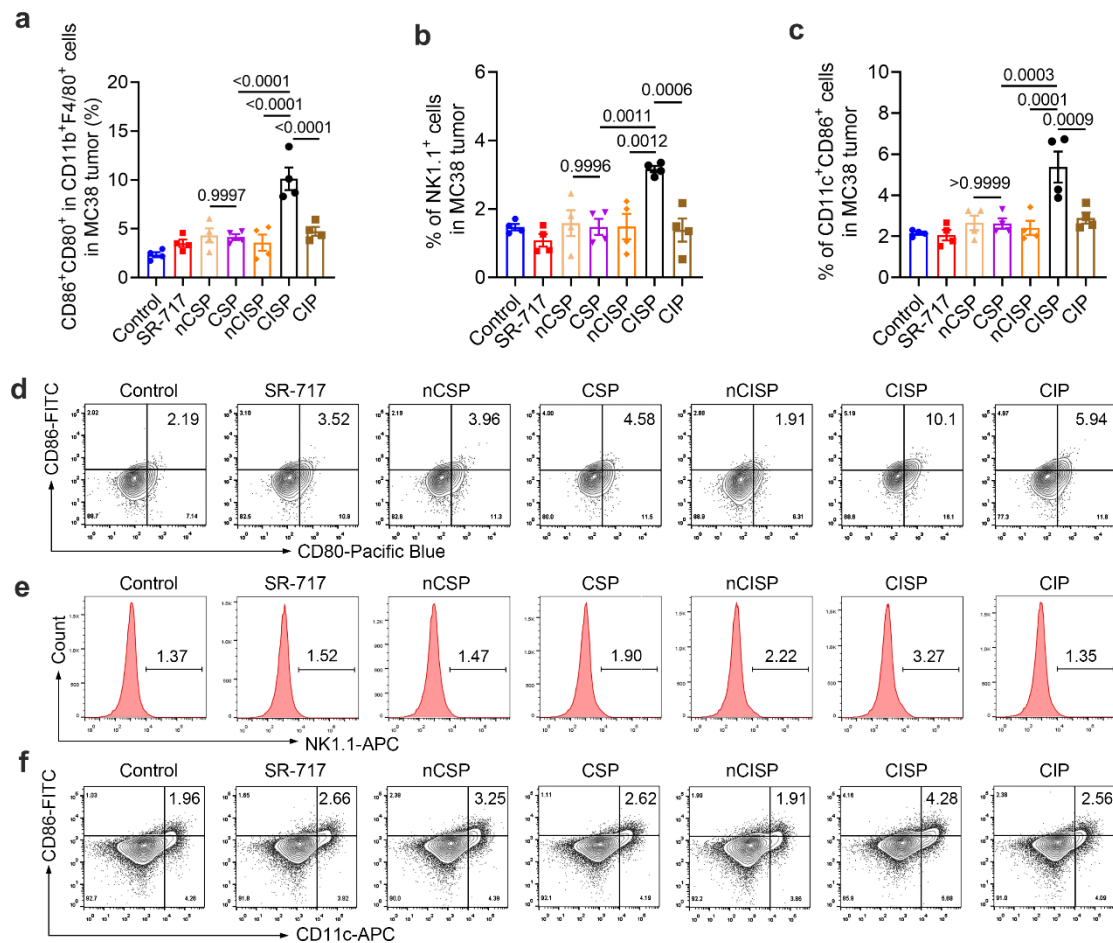

**Supplementary Figure 38. Macrophages, NK cells and DCs in MC38 tumors.** **a** Flow-cytometric analysis of CD80<sup>+</sup>CD86<sup>+</sup> cells in CD11b<sup>+</sup>F4/80<sup>+</sup> cells in MC38 tumors at 18 days post tumor inoculation. Data represent mean  $\pm$  SEM,  $n = 4$  mice. **b** Flow-cytometric analysis of NK1.1<sup>+</sup> cells in MC38 tumors at 18 days post tumor inoculation. Data represent mean  $\pm$  SEM,  $n = 4$  mice. **c** Flow-cytometric analysis of CD11c<sup>+</sup>CD86<sup>+</sup> cells in MC38 tumors at 18 days post tumor inoculation. Data represent mean  $\pm$  SEM,  $n = 4$  mice. **d** Representative flow cytometry dot plot of CD80<sup>+</sup>CD86<sup>+</sup> cells in CD11b<sup>+</sup>F4/80<sup>+</sup> cells in MC38 tumors.  $n = 4$  mice. **e** Representative flow cytometry dot plot of NK1.1<sup>+</sup> cells in MC38 tumors.  $n = 4$  mice. **f** Representative flow cytometry dot plot of CD11c<sup>+</sup>CD86<sup>+</sup> in MC38 tumors.  $n = 4$  mice. Statistical significance was determined by one-way ANOVA test in **a**, **b**, **c**, and it was two-sided and adjustments were made for multiple comparisons. Source data are provided as a Source Data file. QFN, Quercetin-ferrum nanoparticles; QFN<sub>717</sub>, QFN loaded with SR-717; nCSP, normal-Cholesterol cell membrane coated QFN<sub>717</sub>; CSP, low-Cholesterol membrane coated QFN<sub>717</sub>; nCISP, normal-Cholesterol cell membrane coated ICB agent and QFN<sub>717</sub>; CISP, low-Cholesterol membrane coated ICB agent and QFN<sub>717</sub>; CIP, low-Cholesterol membrane coated ICB agent and QFN.

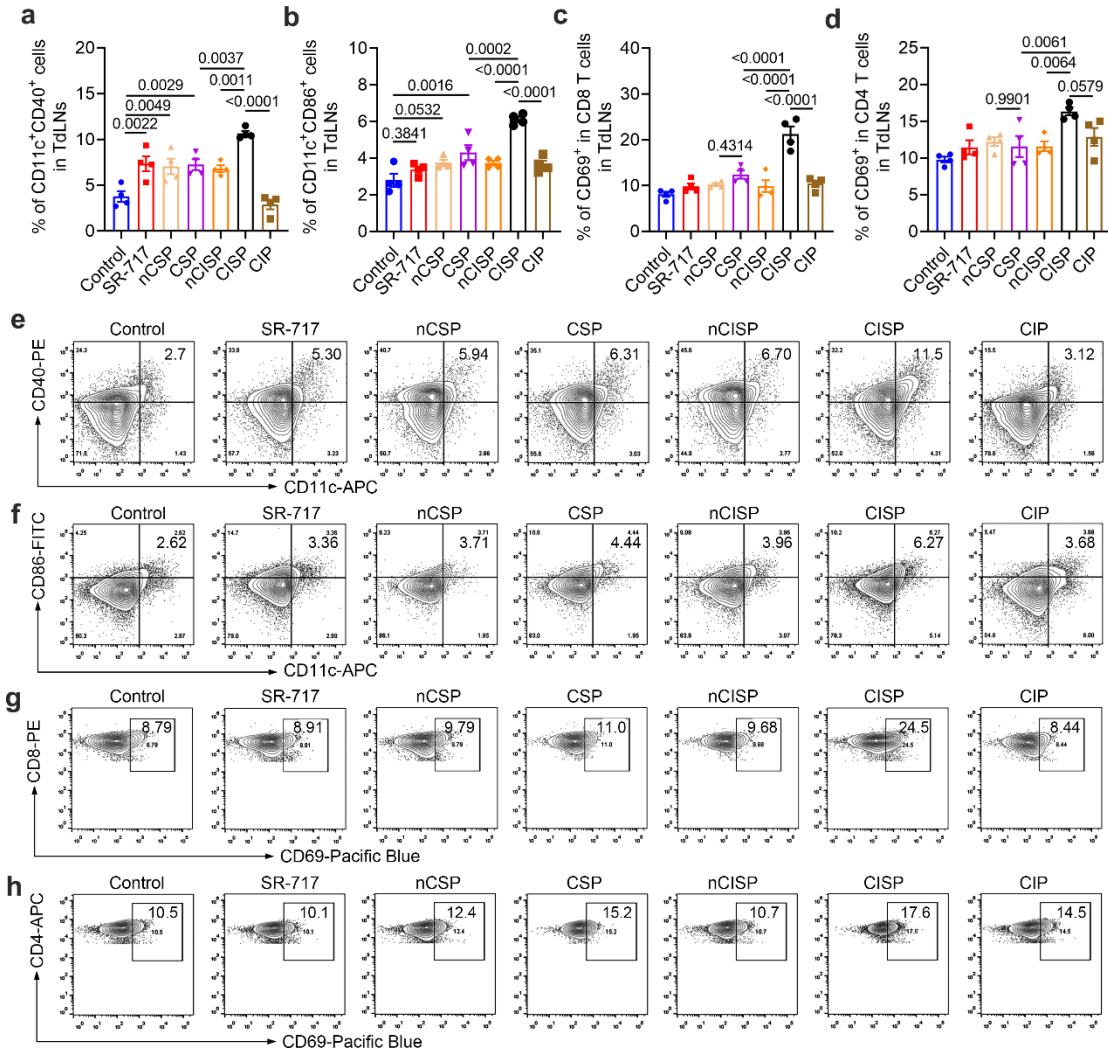

**Supplementary Figure 39. DCs and T cells in the TdLNs in mice bearing MC38 tumors.** **a, b** Flow-cytometric analysis of CD11c<sup>+</sup>CD40<sup>+</sup> cells (**a**) and CD11<sup>+</sup>CD86<sup>+</sup> cells (**b**) in the TdLNs at 18 days post tumor inoculation. Data represent mean  $\pm$  SEM,  $n = 4$  mice. **c, d** Flow-cytometric analysis of CD69<sup>+</sup> cells in CD3<sup>+</sup>CD8<sup>+</sup> cells (**c**) and CD69<sup>+</sup> cells in CD3<sup>+</sup>CD4<sup>+</sup> cells (**d**) in TdLNs at 18 days post tumor inoculation. Data represent mean  $\pm$  SEM,  $n = 4$  mice. **e, f** Representative flow cytometry dot plot of CD11c<sup>+</sup>CD40<sup>+</sup> cells (**e**) and CD11<sup>+</sup>CD86<sup>+</sup> cells (**f**) in the TdLNs.  $n = 4$  mice. **g, h** Representative flow cytometry dot plot of CD69<sup>+</sup> cells in CD8 T cells (**g**) and CD69<sup>+</sup> cells in CD4 T cells (**h**) in the TdLNs.  $n = 4$  mice. Statistical significance was determined by one-way ANOVA test in **a, b, c, d**, and it was two-sided and adjustments were made for multiple comparisons. Source data are provided as a Source Data file. QFN, Quercetin-ferrum nanoparticles; QFN<sub>717</sub>, QFN loaded with SR-717; nCSP, normal-Cholesterol cell membrane coated QFN<sub>717</sub>; CSP, low-Cholesterol membrane coated QFN<sub>717</sub>; nCISP, normal-Cholesterol cell membrane coated ICB agent and QFN<sub>717</sub>; CISP, low-Cholesterol membrane coated ICB agent and QFN<sub>717</sub>; CIP, low-Cholesterol membrane coated ICB agent and QFN; TdLNs, Tumor draining lymph nodes.

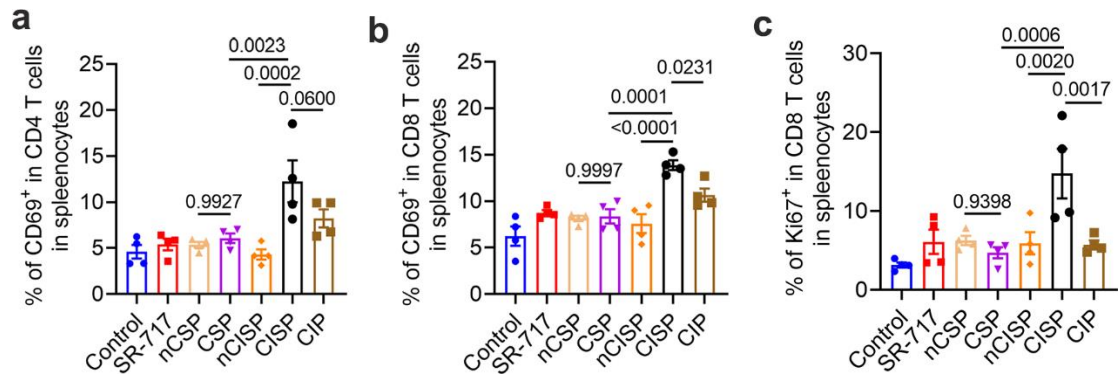

**Supplementary Figure 40. Activated T cells in splenocytes in mice bearing MC38 tumors.** **a, b, c** Flow-cytometric analysis of CD69<sup>+</sup> cells in CD3<sup>+</sup>CD4<sup>+</sup> cells (**a**), CD69<sup>+</sup> cells in CD3<sup>+</sup>CD8<sup>+</sup> cells (**b**), and Ki67<sup>+</sup> cells in CD3<sup>+</sup>CD8<sup>+</sup> cell (**c**) in splenocytes at 18 days post tumor inoculation. Data represent mean  $\pm$  SEM,  $n = 4$  mice. Statistical significance was determined by one-way ANOVA test in **a, b, c**, and it was two-sided and adjustments were made for multiple comparisons. Source data are provided as a Source Data file. QFN, Quercetin-ferrum nanoparticles; QFN<sub>717</sub>, QFN loaded with SR-717; nCSP, normal-Cholesterol cell membrane coated QFN<sub>717</sub>; CSP, low-Cholesterol membrane coated QFN<sub>717</sub>; nCISP, normal-Cholesterol cell membrane coated ICB agent and QFN<sub>717</sub>; CISP, low-Cholesterol membrane coated ICB agent and QFN<sub>717</sub>; CIP, low-Cholesterol membrane coated ICB agent and QFN.

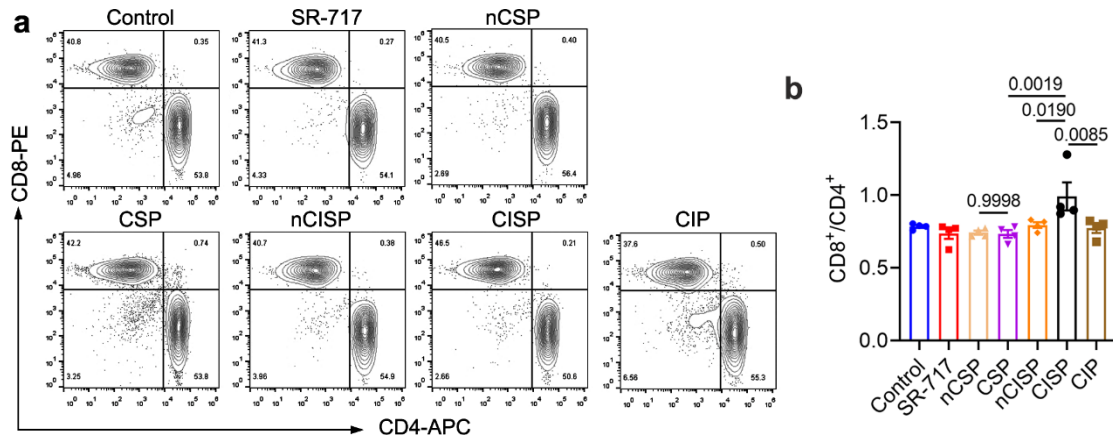

**Supplementary Figure 41. Proportions of CD8<sup>+</sup> and CD4<sup>+</sup> T cells in TdLNs in mice bearing MC38 tumors. a, b** Representative flow cytometry dot plot gated on CD3<sup>+</sup> T cells (**a**) and the proportions of CD8<sup>+</sup>/CD4<sup>+</sup> (**b**). Data represent mean  $\pm$  SEM,  $n = 4$  mice. Statistical significance was determined by one-way ANOVA test in **b**, and it was two-sided and adjustments were made for multiple comparisons. Source data are provided as a Source Data file. QFN, Quercetin-ferrum nanoparticles; QFN<sub>717</sub>, QFN loaded with SR-717; nCSP, normal-Cholesterol cell membrane coated QFN<sub>717</sub>; CSP, low-Cholesterol membrane coated QFN<sub>717</sub>; nCISP, normal-Cholesterol cell membrane coated ICB agent and QFN<sub>717</sub>; CISP, low-Cholesterol membrane coated ICB agent and QFN<sub>717</sub>; CIP, low-Cholesterol membrane coated ICB agent and QFN.

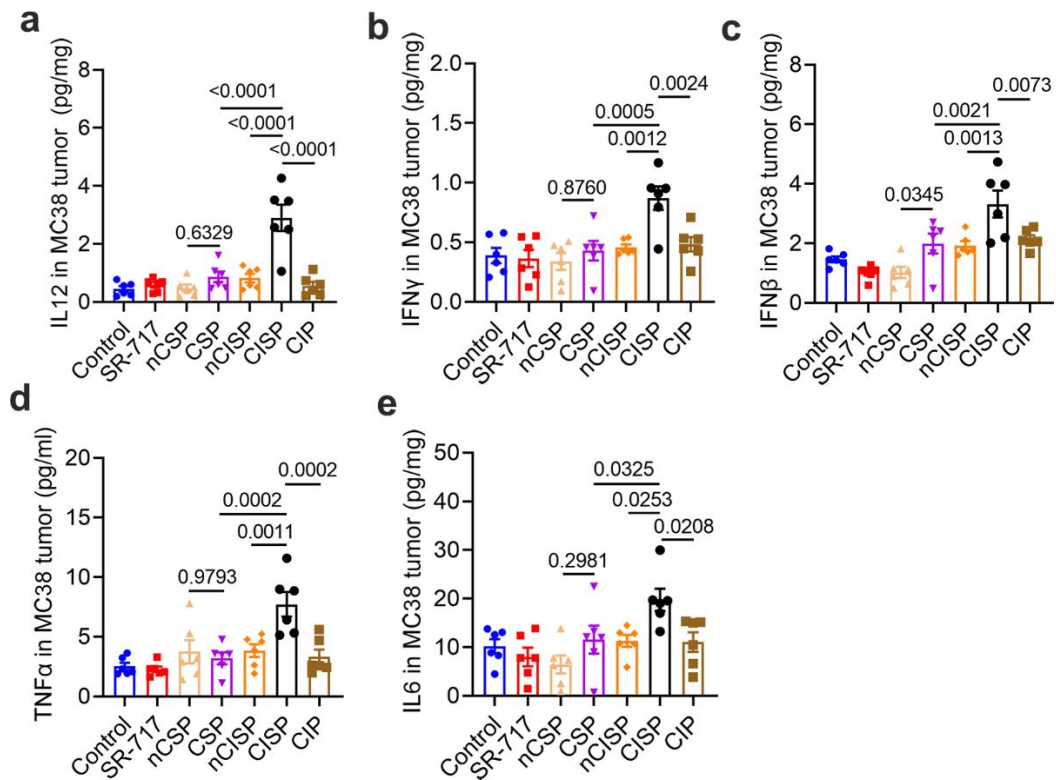

**Supplementary Figure 42. Concentration of cytokines in MC38 tumors. a, b, c, d, e** Concentration of IL12 (a), IFN $\gamma$  (b), IFN $\beta$  (c), TNF $\alpha$  (d) and IL-6 (e) in MC38 tumors at 18 days post tumor inoculation. Data represent mean  $\pm$  SEM,  $n = 6$  mice. Statistical significance was determined by one-way ANOVA test in a, b, c, d, e, and it was two-sided and adjustments were made for multiple comparisons. Source data are provided as a Source Data file. QFN, Quercetin-ferrum nanoparticles; QFN<sub>717</sub>, QFN loaded with SR-717; nCSP, normal-Cholesterol cell membrane coated QFN<sub>717</sub>; CSP, low-Cholesterol membrane coated QFN<sub>717</sub>; nCISP, normal-Cholesterol cell membrane coated ICB agent and QFN<sub>717</sub>; CISP, low-Cholesterol membrane coated ICB agent and QFN<sub>717</sub>; CIP, low-Cholesterol membrane coated ICB agent and QFN.

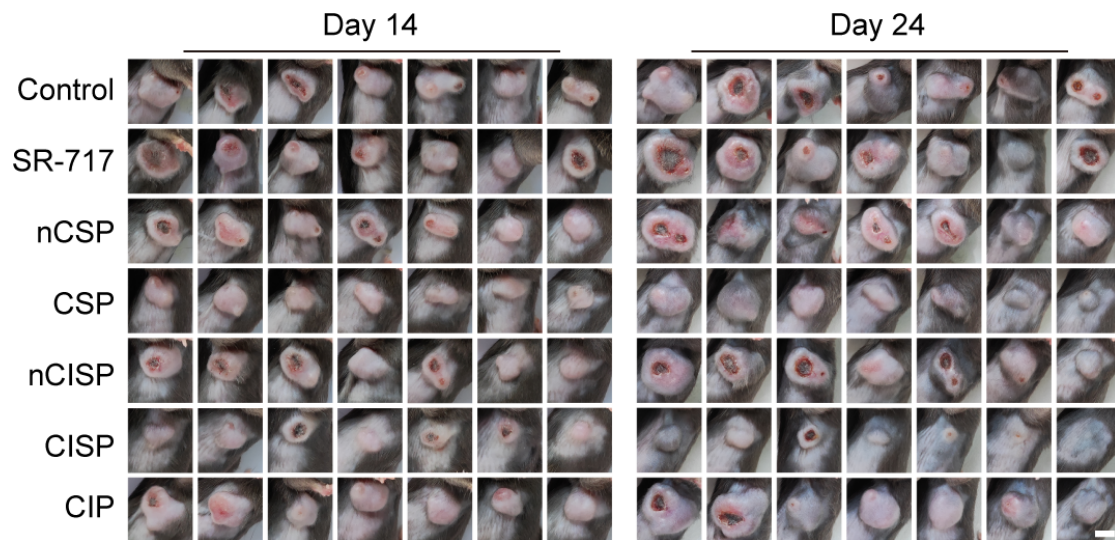

**Supplementary Figure 43. Images of MC38 tumors at 14 days and 24 days post tumor inoculation.**  $n = 7$  mice. Scale bar = 0.5 cm. QFN, Quercetin-ferrum nanoparticles; QFN<sub>717</sub>, QFN loaded with SR-717; nCSP, normal-Cholesterol cell membrane coated QFN<sub>717</sub>; CSP, low-Cholesterol membrane coated QFN<sub>717</sub>; nCISP, normal-Cholesterol cell membrane coated ICB agent and QFN<sub>717</sub>; CISP, low-Cholesterol membrane coated ICB agent and QFN<sub>717</sub>; CIP, low-Cholesterol membrane coated ICB agent and QFN.

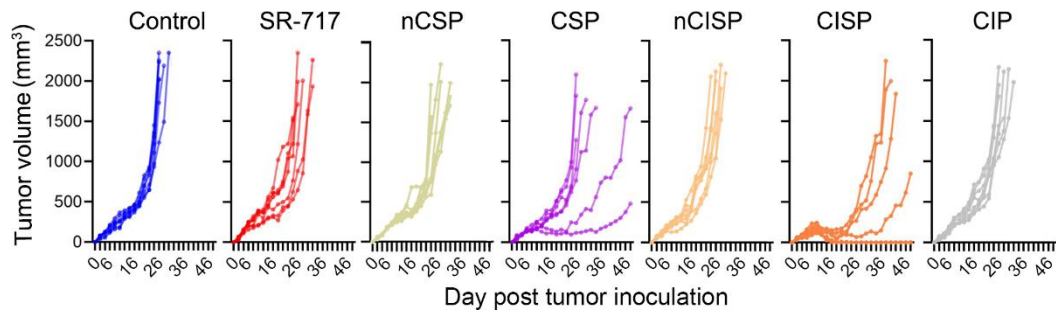

**Supplementary Figure 44. Tumor growth curve of mice bearing MC38 tumors.**  $n = 7$  mice. Source data are provided as a Source Data file. QFN, Quercetin-ferrum nanoparticles; QFN<sub>717</sub>, QFN loaded with SR-717; nCSP, normal-Cholesterol cell membrane coated QFN<sub>717</sub>; CSP, low-Cholesterol membrane coated QFN<sub>717</sub>; nCISP, normal-Cholesterol cell membrane coated ICB agent and QFN<sub>717</sub>; CISP, low-Cholesterol membrane coated ICB agent and QFN<sub>717</sub>; CIP, low-Cholesterol membrane coated ICB agent and QFN.

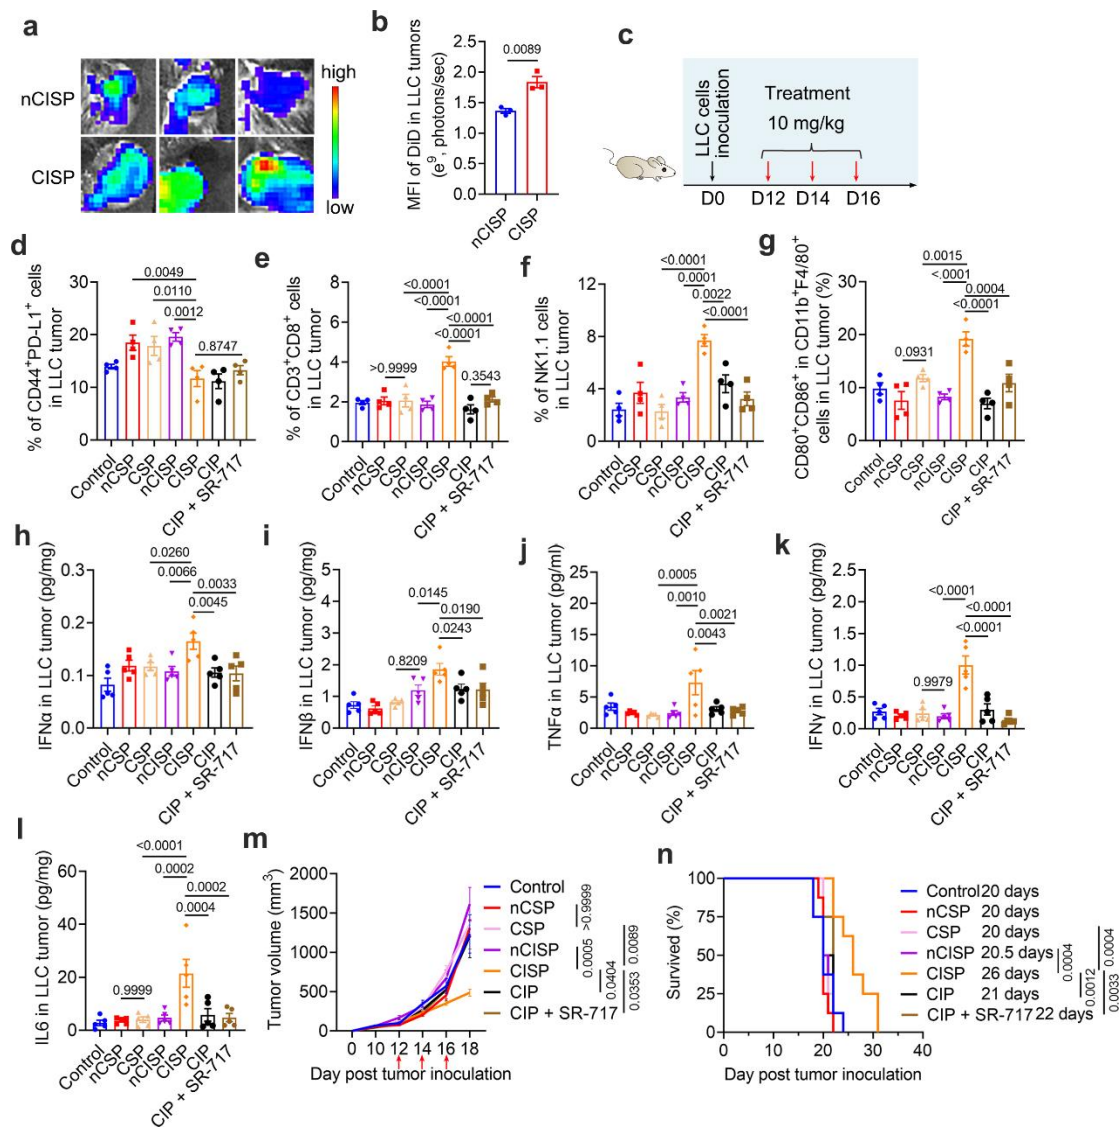

**Supplementary Figure 45. The therapeutic effects of CISP in mice bearing LLC tumors.** **a, b** Fluorescence images of LLC tumors at 6 h post injection of nCISP and CISP (**a**), and the mean fluorescence intensity (MFI) of DiD in tumors (**b**). Data represent mean  $\pm$  SEM,  $n = 3$  mice. **c** Schematic illustration showing the experiment process. Red arrows indicate the administration of nanomedicines. The dosage of SR-717 is 10 mg/kg. **d** Flow-cytometric analysis of CD44<sup>+</sup>PD-L1<sup>+</sup> cells in LLC tumors at 18 days post tumor inoculation. Data represent mean  $\pm$  SEM,  $n = 4$  mice. **e** Flow-cytometric analysis of CD3<sup>+</sup>CD8<sup>+</sup> cells in LLC tumors at 18 days post tumor inoculation. Data represent mean  $\pm$  SEM,  $n = 4$  mice. **f** Flow-cytometric analysis of NK1.1<sup>+</sup> cells in LLC tumors at 18 days post tumor inoculation. Data represent mean  $\pm$  SEM,  $n = 4$  mice. **g** Flow-cytometric analysis of CD80<sup>+</sup>CD86<sup>+</sup> cells in F4/80<sup>+</sup>CD11b<sup>+</sup> cells in LLC tumors at 18 days post tumor inoculation. Data represent mean  $\pm$  SEM,  $n = 4$  mice. **h, i, j, k, l** IFN $\alpha$  (**h**), IFN $\beta$  (**i**), TNF $\alpha$  (**j**), IFN $\gamma$  (**k**) and IL6 (**l**) in LLC tumors at 18 days post tumor inoculation. Data represent mean  $\pm$  SEM,  $n = 5$  mice. **m** Tumor growth curve of mice bearing LLC tumors. Red arrows indicate administration of nanomedicines. Data represent mean  $\pm$  SEM,  $n = 8$  mice. **n** Survival curve of mice bearing LLC tumors.  $n = 8$  mice. Student's two-sided  $t$  test was used for the statistical



analysis in **b**. Statistical significance was determined by one-way ANOVA test in **d**, **e**, **f**, **g**, **h**, **i**, **j**, **k**, **l**, and it was two-sided and adjustments were made for multiple comparisons. Statistical significance was determined by two-way ANOVA test in **m**, and it was two-sided and adjustments were made for multiple comparisons. Survival was measured using the Kaplan-Meier method and statistical significance was calculated by log-rank test in **n**. Source data are provided as a Source Data file. QFN, Quercetin-ferrum nanoparticles; QFN<sub>717</sub>, QFN loaded with SR-717; nCSP, normal-Cholesterol cell membrane coated QFN<sub>717</sub>; CSP, low-Cholesterol membrane coated QFN<sub>717</sub>; nCISP, normal-Cholesterol cell membrane coated ICB agent and QFN<sub>717</sub>; CISP, low-Cholesterol membrane coated ICB agent and QFN<sub>717</sub>; CIP, low-Cholesterol membrane coated ICB agent and QFN.

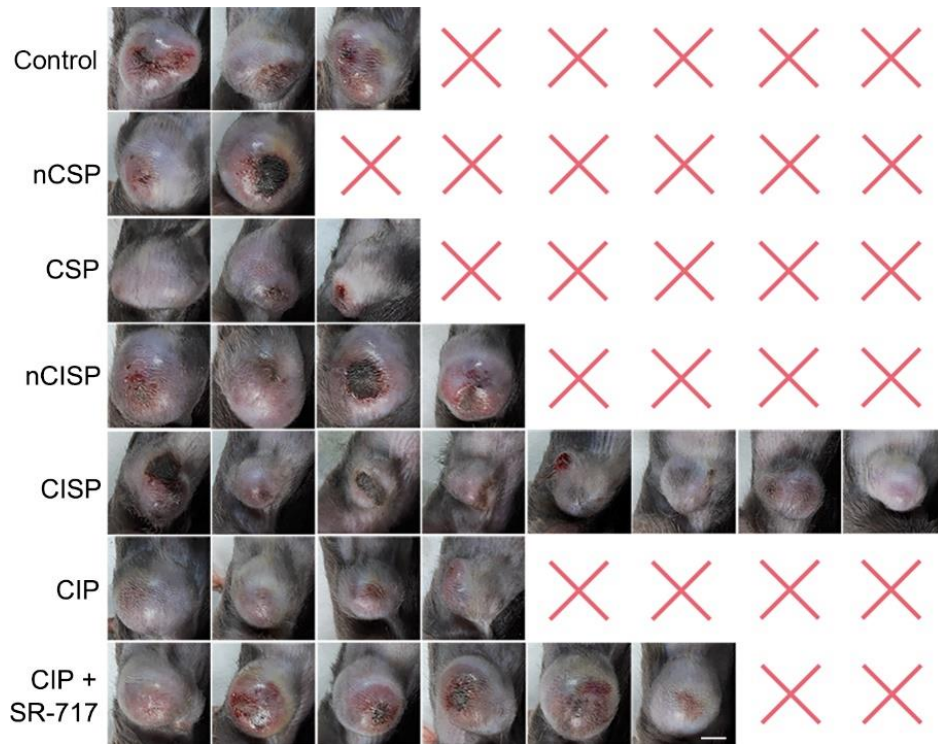

**Supplementary Figure 46. Images of LLC tumors in mice at 20 days post tumor inoculation.** Red cross line represents the dead mouse.  $n = 8$  mice. Scale bar = 0.5 cm. QFN, Quercetin-ferrum nanoparticles; QFN<sub>717</sub>, QFN loaded with SR-717; nCSP, normal-Cholesterol cell membrane coated QFN<sub>717</sub>; CSP, low-Cholesterol membrane coated QFN<sub>717</sub>; nCISP, normal-Cholesterol cell membrane coated ICB agent and QFN<sub>717</sub>; CISP, low-Cholesterol membrane coated ICB agent and QFN<sub>717</sub>; CIP, low-Cholesterol membrane coated ICB agent and QFN.

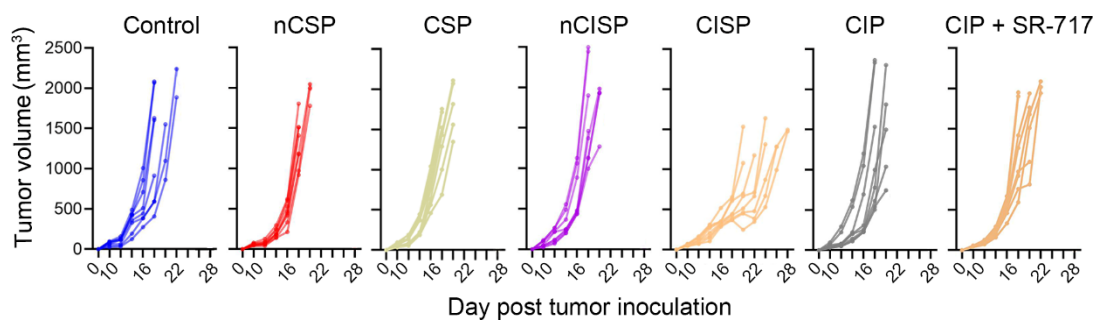

**Supplementary Figure 47. Tumor growth curve of mice bearing LLC tumors.**  $n = 8$  mice. Source data are provided as a Source Data file. QFN, Quercetin-ferrum nanoparticles; QFN<sub>717</sub>, QFN loaded with SR-717; nCSP, normal-Cholesterol cell membrane coated QFN<sub>717</sub>; CSP, low-Cholesterol membrane coated QFN<sub>717</sub>; nCISP, normal-Cholesterol cell membrane coated ICB agent and QFN<sub>717</sub>; CISP, low-Cholesterol membrane coated ICB agent and QFN<sub>717</sub>; CIP, low-Cholesterol membrane coated ICB agent and QFN.

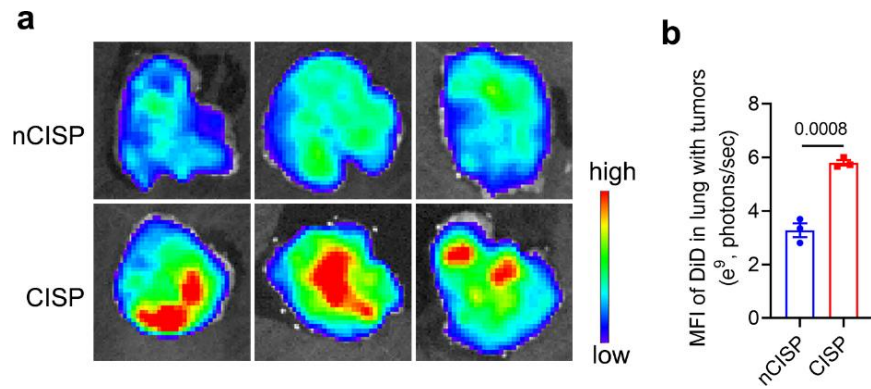

**Supplementary Figure 48. Fluorescence images of lung with metastatic melanoma.** **a, b** Fluorescence images of lung at 6 h post injection of nCISP and CISP (**a**), and the mean fluorescence intensity (MFI) of DiD in lung (**b**). Data represent mean  $\pm$  SEM,  $n = 3$  mice. Student's two-sided  $t$  test was used for the statistical analysis in **b**. Source data are provided as a Source Data file. QFN, Quercetin-ferrum nanoparticles; QFN<sub>717</sub>, QFN loaded with SR-717; nCISP, normal-Cholesterol cell membrane coated ICB agent and QFN<sub>717</sub>; CISP, low-Cholesterol membrane coated ICB agent and QFN<sub>717</sub>.

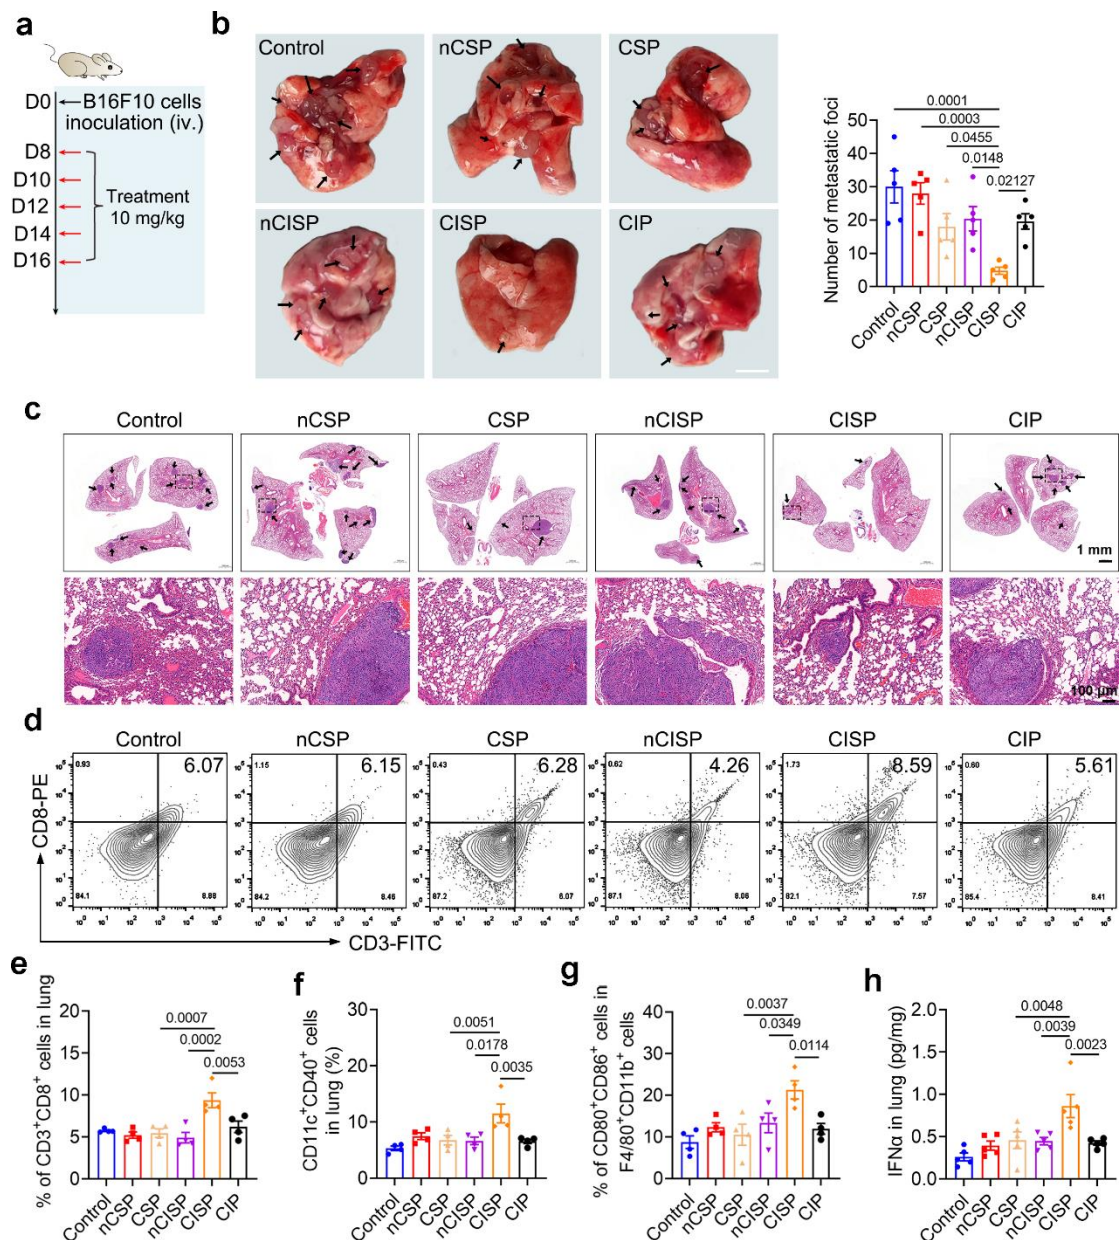

**Supplementary Figure 49. The therapeutic effects of CISP in mice bearing metastatic melanoma.** **a** Schematic illustration of the experiment process. The dosage of SR-717 is 10 mg/kg. Red arrows indicate the administration of nanomedicines. **b** Representative images of lung and the number of pulmonary metastasis foci at 18 days post B16F10 injection. Metastasis foci is pointed by arrow. Scale bar = 0.3 cm. Data represent mean  $\pm$  SEM,  $n = 5$  mice. **c** Representative images of H&E staining of lung sections in mice. Metastasis foci is pointed by arrow.  $n = 5$  mice. **d, e** Flow-cytometric analysis of CD3<sup>+</sup>CD8<sup>+</sup> cell in lung at 18 days post B16F10 injection. Data represent mean  $\pm$  SEM,  $n = 4$  mice. **f** Flow-cytometric analysis of CD11c<sup>+</sup>CD40<sup>+</sup> cells in lung at 18 days post B16F10 injection. Data represent mean  $\pm$  SEM,  $n = 4$  mice. **g** Flow-cytometric analysis of CD80<sup>+</sup>CD86<sup>+</sup> cells in F4/80<sup>+</sup>CD11b<sup>+</sup> cells in lung at 18 days post B16F10 injection. Data represent mean  $\pm$  SEM,  $n = 4$  mice. **h** IFN $\alpha$  in lung at 18 days post B16F10 injection. Data represent mean  $\pm$  SEM,  $n = 5$  mice. Statistical significance was determined by one-way ANOVA test in **b, e, f, g, h**, and it was two-sided and

adjustments were made for multiple comparisons. Source data are provided as a Source Data file. QFN, Quercetin-ferrum nanoparticles; QFN<sub>717</sub>, QFN loaded with SR-717; nCSP, normal-Cholesterol cell membrane coated QFN<sub>717</sub>; CSP, low-Cholesterol membrane coated QFN<sub>717</sub>; nCISP, normal-Cholesterol cell membrane coated ICB agent and QFN<sub>717</sub>; CISP, low-Cholesterol membrane coated ICB agent and QFN<sub>717</sub>; CIP, low-Cholesterol membrane coated ICB agent and QFN.

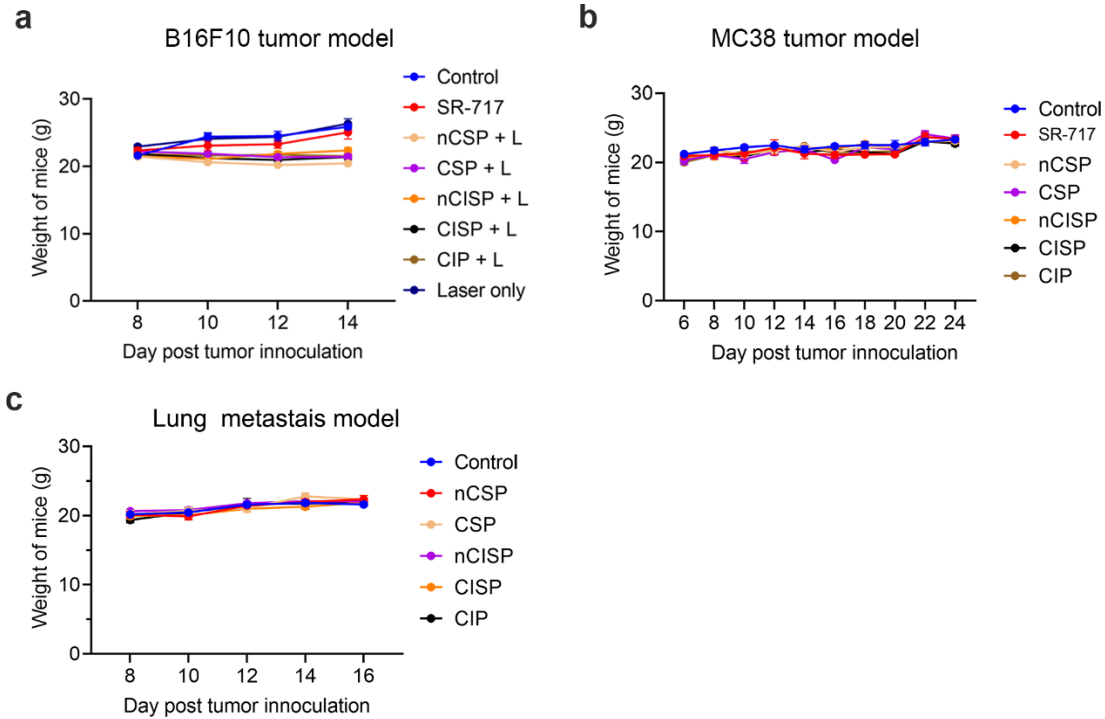

**Supplementary Figure 50. Body weight of mice.** **a** Body weight of mice bearing B16F10 melanoma receiving the indicated treatment. Data represent mean  $\pm$  SEM,  $n = 5$  mice. **b** Body weight of mice bearing MC38 tumors receiving the indicated treatment. Data represent mean  $\pm$  SEM,  $n = 5$  mice. **c** Body weight of mice bearing metastatic melanoma receiving the indicated treatment. Data represent mean  $\pm$  SEM,  $n = 5$  mice. Source data are provided as a Source Data file. L, laser; QFN, Quercetin-ferrum nanoparticles; QFN<sub>717</sub>, QFN loaded with SR-717; nCSP, normal-Cholesterol cell membrane coated QFN<sub>717</sub>; CSP, low-Cholesterol membrane coated QFN<sub>717</sub>; nCISP, normal-Cholesterol cell membrane coated ICB agent and QFN<sub>717</sub>; CISP, low-Cholesterol membrane coated ICB agent and QFN<sub>717</sub>; CIP, low-Cholesterol membrane coated ICB agent and QFN.

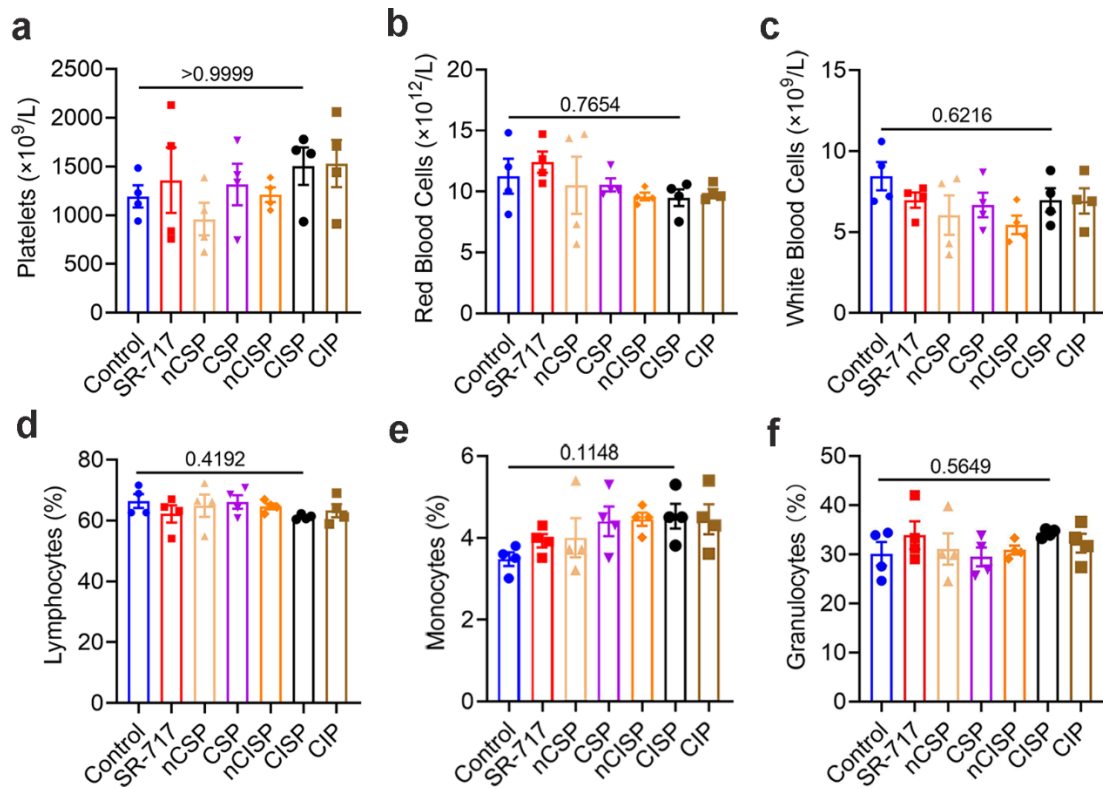

**Supplementary Figure 51. Blood routine of mice bearing MC38 tumors at 18 days post tumor inoculation.** **a** Platelets in mice receiving the indicated treatment. Data represent mean  $\pm$  SEM,  $n = 4$  mice. **b** Red blood cells in mice receiving the indicated treatment. Data represent mean  $\pm$  SEM,  $n = 4$  mice. **c** White blood cells in mice receiving the indicated treatment. Data represent mean  $\pm$  SEM,  $n = 4$  mice. **d** Lymphocytes in mice receiving the indicated treatment. Data represent mean  $\pm$  SEM,  $n = 4$  mice. **e** Monocytes in mice receiving the indicated treatment. Data represent mean  $\pm$  SEM,  $n = 4$  mice. **f** Granulocytes in mice receiving the indicated treatment. Data represent mean  $\pm$  SEM,  $n = 4$  mice. Statistical significance was determined by one-way ANOVA test in **a**, **b**, **c**, **d**, **e**, **f**, and it was two-sided and adjustments were made for multiple comparisons. Source data are provided as a Source Data file. QFN, Quercetin-ferrous nanoparticles; QFN<sub>717</sub>, QFN loaded with SR-717; nCSP, normal-Cholesterol cell membrane coated QFN<sub>717</sub>; CSP, low-Cholesterol membrane coated QFN<sub>717</sub>; nCISP, normal-Cholesterol cell membrane coated ICB agent and QFN<sub>717</sub>; CISP, low-Cholesterol membrane coated ICB agent and QFN<sub>717</sub>; CIP, low-Cholesterol membrane coated ICB agent and QFN.



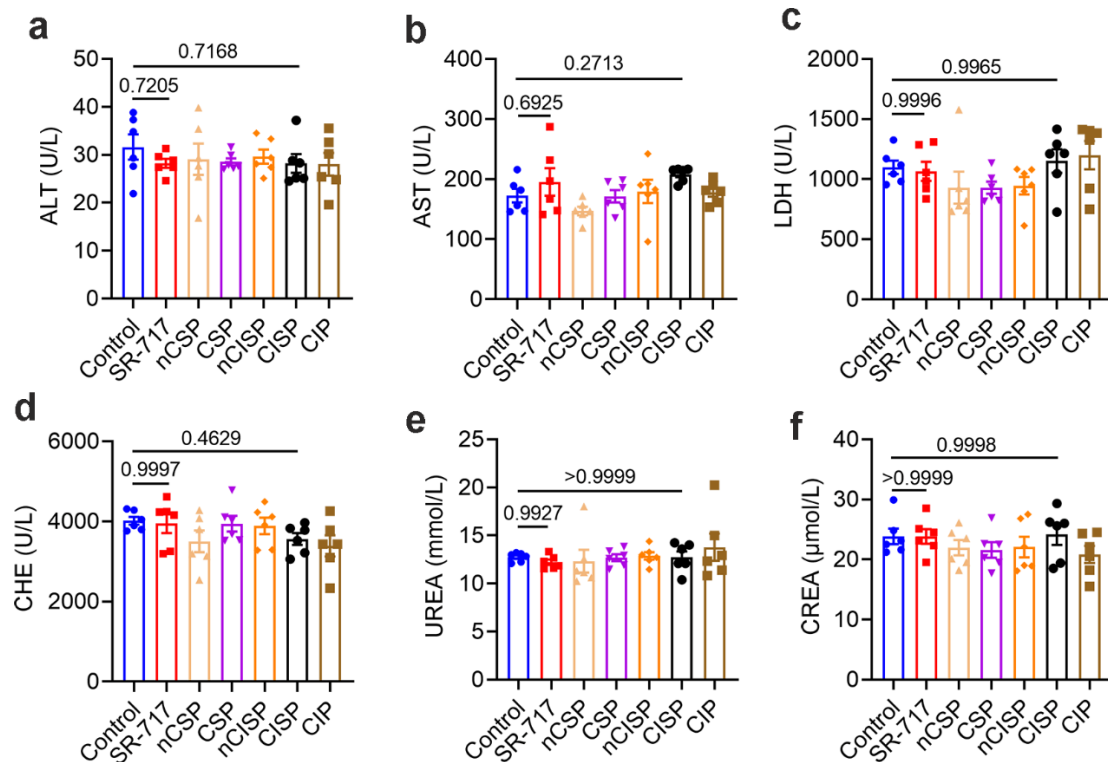

**Supplementary Figure 52. Blood biochemistry of mice bearing MC38 tumors at 18 days post tumor inoculation.** **a** The serum level of ALT in mice receiving the indicated treatment. Data represent mean  $\pm$  SEM,  $n = 6$  mice. **b** The serum level of AST in mice receiving the indicated treatment. Data represent mean  $\pm$  SEM,  $n = 6$  mice. **c** The serum level of LDH in mice receiving the indicated treatment. Data represent mean  $\pm$  SEM,  $n = 6$  mice. **d** The serum level of CHE in mice receiving the indicated treatment. Data represent mean  $\pm$  SEM,  $n = 6$  mice. **e** The serum level of UREA in mice receiving the indicated treatment. Data represent mean  $\pm$  SEM,  $n = 6$  mice. **f** The serum level of CREA in mice receiving the indicated treatment. Data represent mean  $\pm$  SEM,  $n = 6$  mice. Statistical significance was determined by one-way ANOVA test in **a**, **b**, **c**, **d**, **e**, **f**, and it was two-sided and adjustments were made for multiple comparisons. Source data are provided as a Source Data file. ALT, alanine aminotransferase; AST, aspartate aminotransferase; LDH, lactic dehydrogenase; CHE, Cholinesterase; CREA, Creatine. QFN, Quercetin-ferrum nanoparticles; QFN<sub>717</sub>, QFN loaded with SR-717; nCSP, normal-Cholesterol cell membrane coated QFN<sub>717</sub>; CSP, low-Cholesterol membrane coated QFN<sub>717</sub>; nCISP, normal-Cholesterol cell membrane coated ICB agent and QFN<sub>717</sub>; CISP, low-Cholesterol membrane coated ICB agent and QFN<sub>717</sub>; CIP, low-Cholesterol membrane coated ICB agent and QFN.

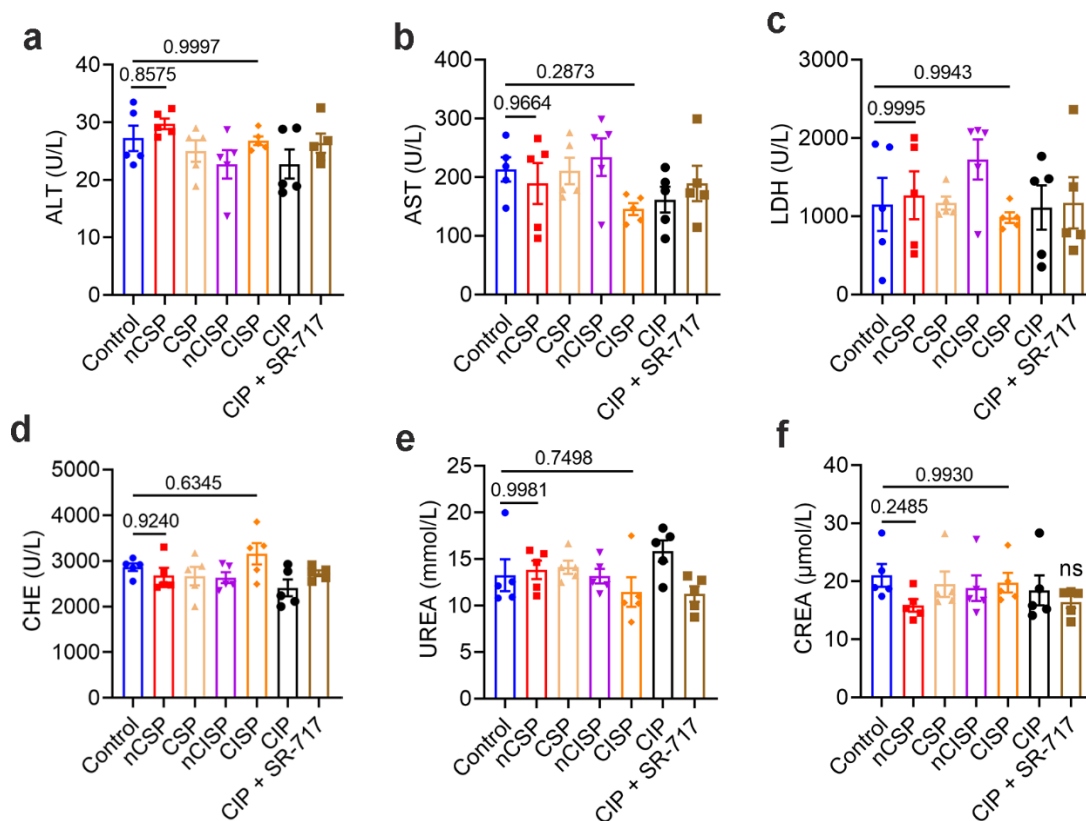

**Supplementary Figure 53. Blood biochemistry of mice bearing LLC tumor at 18 days post tumor inoculation.** **a** The serum level of ALT in mice receiving the indicated treatment. Data represent mean  $\pm$  SEM,  $n = 5$  mice. **b** The serum level of AST in mice receiving the indicated treatment. Data represent mean  $\pm$  SEM,  $n = 5$  mice. **c** The serum level of LDH in mice receiving the indicated treatment. Data represent mean  $\pm$  SEM,  $n = 5$  mice. **d** The serum level of CHE in mice receiving the indicated treatment. Data represent mean  $\pm$  SEM,  $n = 5$  mice. **e** The serum level of UREA in mice receiving the indicated treatment. Data represent mean  $\pm$  SEM,  $n = 5$  mice. **f** The serum level of CREA in mice receiving the indicated treatment. Data represent mean  $\pm$  SEM,  $n = 5$  mice. Statistical significance was determined by one-way ANOVA test in **a**, **b**, **c**, **d**, **e**, **f**, and it was two-sided and adjustments were made for multiple comparisons. Source data are provided as a Source Data file. ALT, alanine aminotransferase; AST, aspartate aminotransferase; LDH, lactic dehydrogenase; CHE, Cholinesterase; CREA, Creatine. QFN, Quercetin-ferrum nanoparticles; QFN<sub>717</sub>, QFN loaded with SR-717; nCSP, normal-Cholesterol cell membrane coated QFN<sub>717</sub>; CSP, low-Cholesterol membrane coated QFN<sub>717</sub>; nCISP, normal-Cholesterol cell membrane coated ICB agent and QFN<sub>717</sub>; CISP, low-Cholesterol membrane coated ICB agent and QFN<sub>717</sub>; CIP, low-Cholesterol membrane coated ICB agent and QFN.

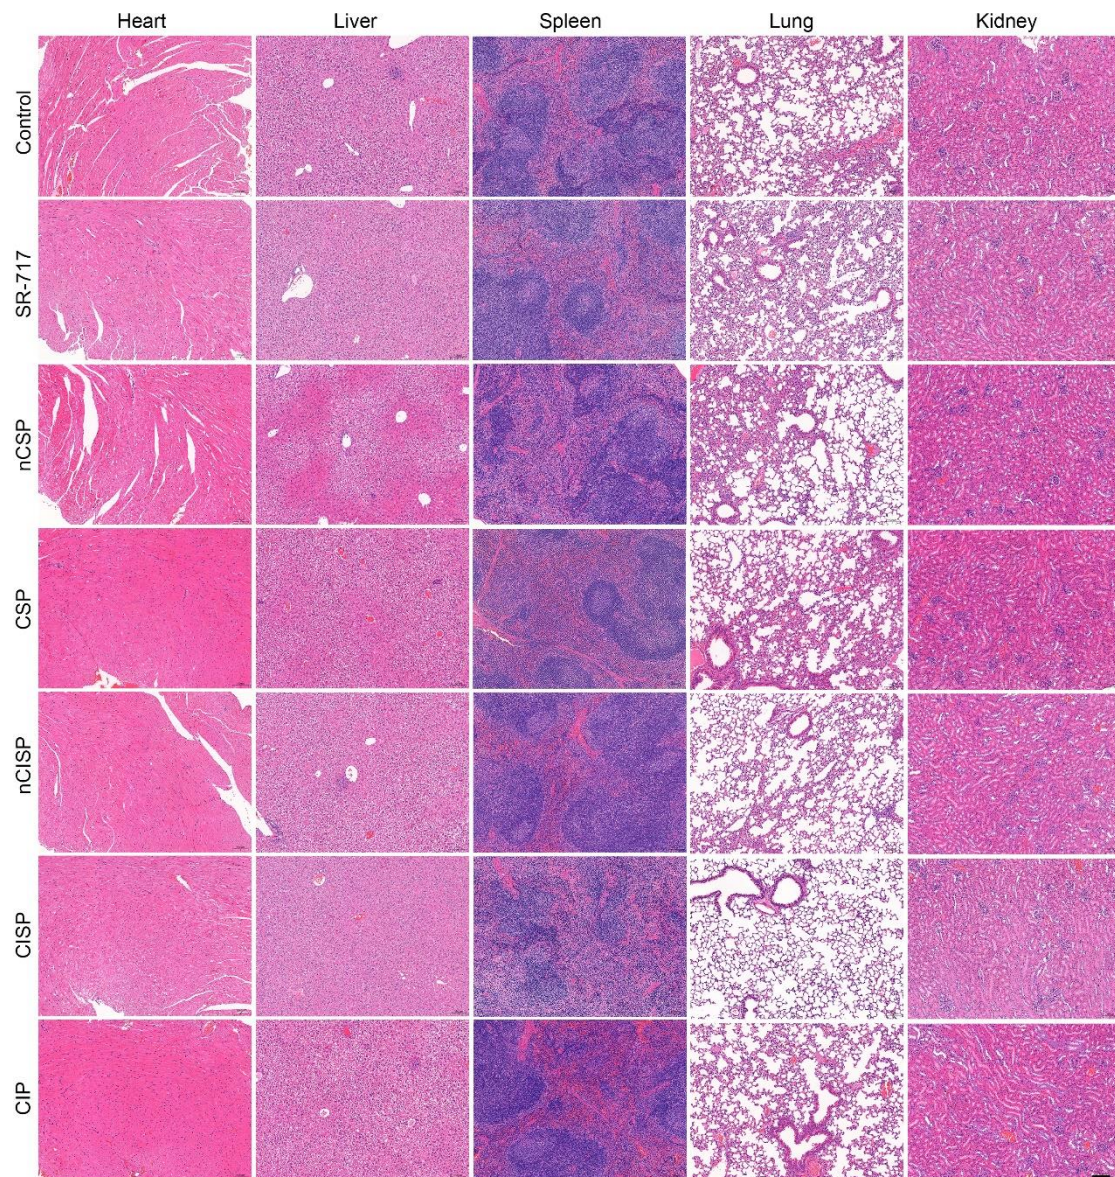

**Supplementary Figure 54. H&E staining of major organs in mice bearing MC38 tumors.** Mice bearing MC38 tumors receiving the indicated treatment were sacrificed at 18 days post tumor inoculation. Scale bar = 100  $\mu$ m.  $n = 3$  mice. QFN, Quercetin-ferrum nanoparticles; QFN<sub>717</sub>, QFN loaded with SR-717; nCSP, normal-Cholesterol cell membrane coated QFN<sub>717</sub>; CSP, low-Cholesterol membrane coated QFN<sub>717</sub>; nCISP, normal-Cholesterol cell membrane coated ICB agent and QFN<sub>717</sub>; CISP, low-Cholesterol membrane coated ICB agent and QFN<sub>717</sub>; CIP, low-Cholesterol membrane coated ICB agent and QFN.

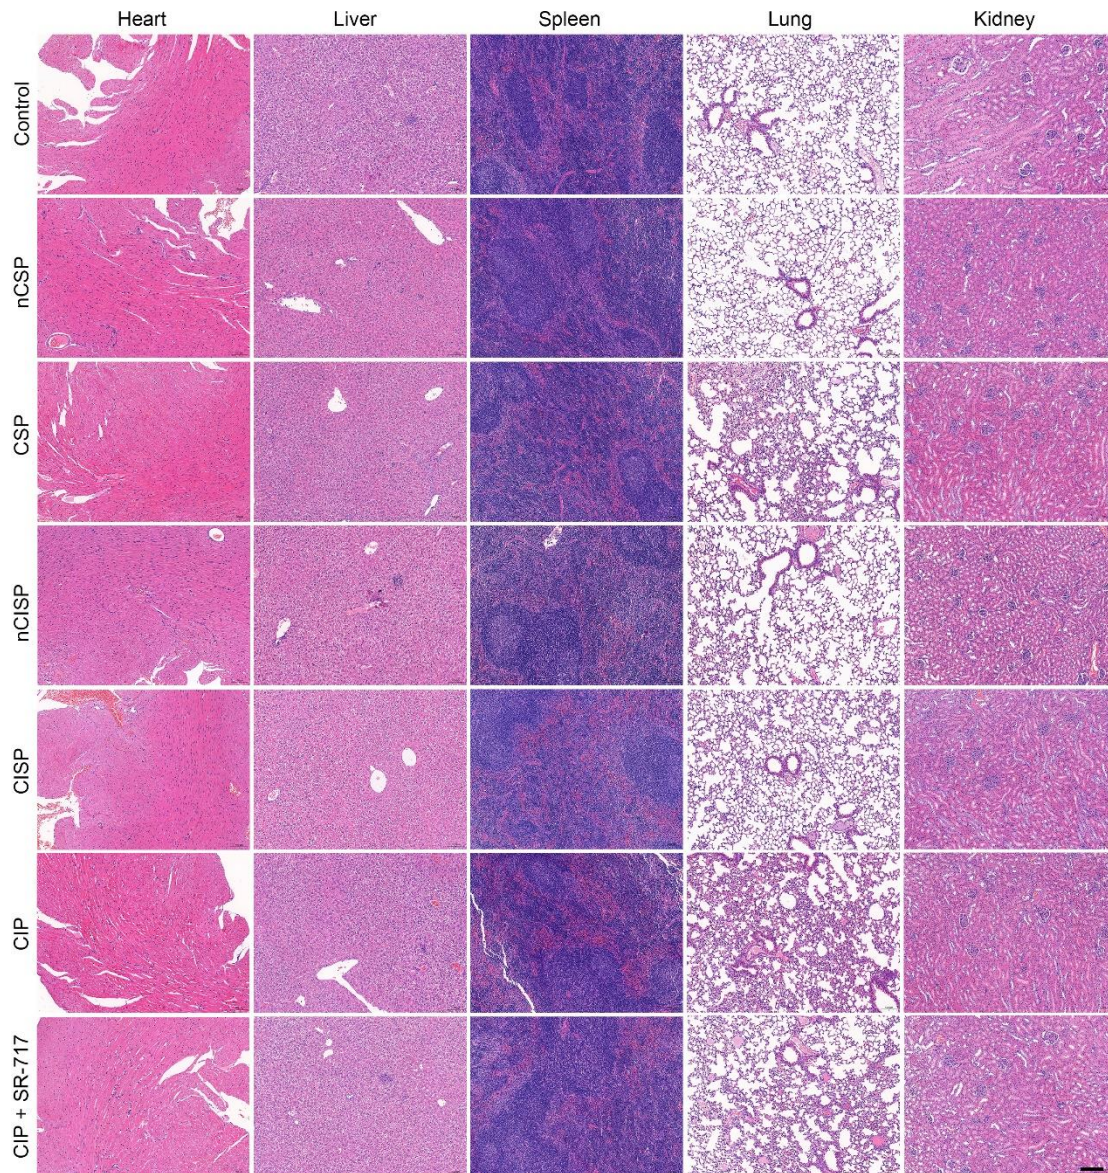

**Supplementary Figure 55. H&E staining of major organs in mice bearing LLC tumors.** Mice bearing LLC tumors receiving the indicated treatment were sacrificed at 18 days post tumor inoculation. Scale bar = 100  $\mu\text{m}$ .  $n = 3$  mice. QFN, Quercetin-ferrum nanoparticles; QFN<sub>717</sub>, QFN loaded with SR-717; nCSP, normal-Cholesterol cell membrane coated QFN<sub>717</sub>; CSP, low-Cholesterol membrane coated QFN<sub>717</sub>; nCISP, normal-Cholesterol cell membrane coated ICB agent and QFN<sub>717</sub>; CISP, low-Cholesterol membrane coated ICB agent and QFN<sub>717</sub>; CIP, low-Cholesterol membrane coated ICB agent and QFN.

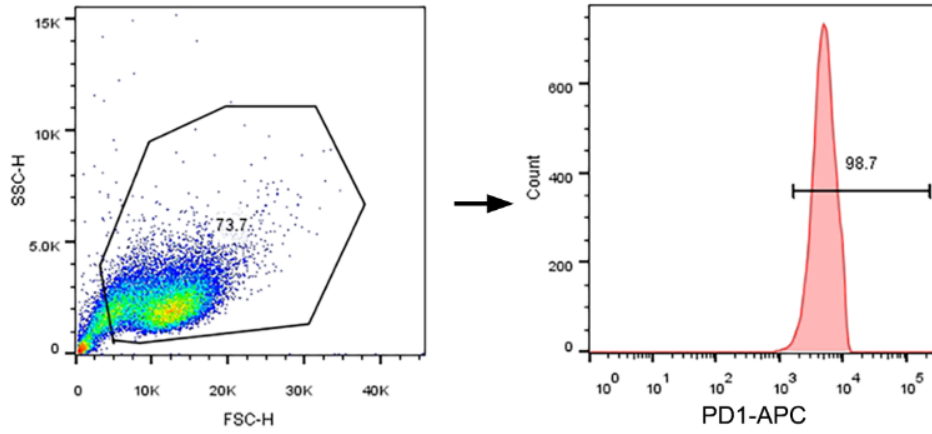

**Supplementary Figure 56.** Gating strategy to quantify PD-1 level on the membrane of CTL2-PD1 cells (Fig. 1b).

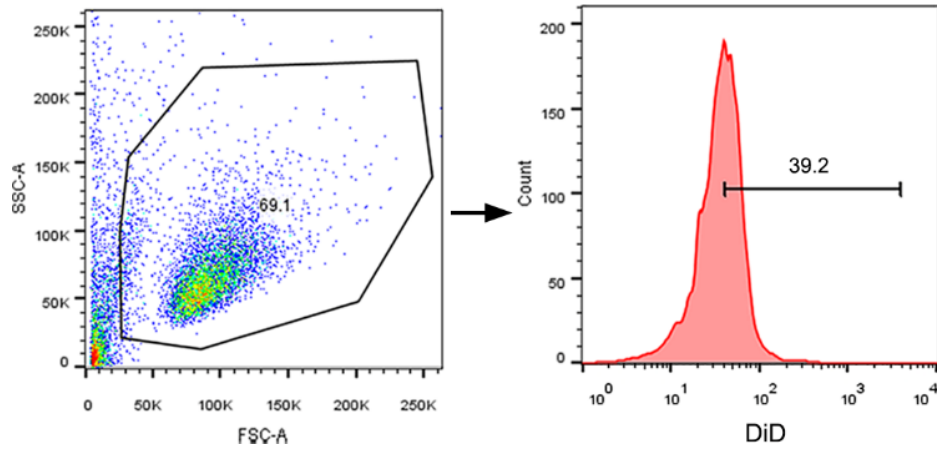

**Supplementary Figure 57.** Gating strategy to quantify the uptake of nanoparticles by cells (Fig. 2a, b, Supplementary Figure 18a-d).

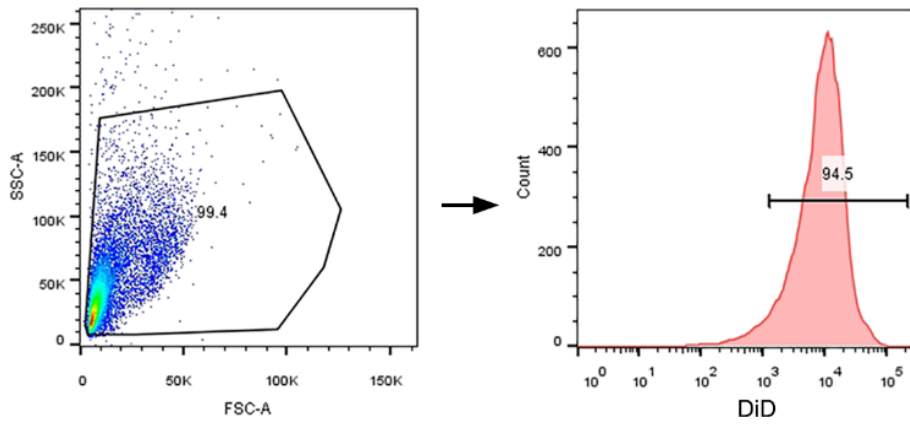

**Supplementary Figure 58.** Gating strategy to quantify the uptake of nanoparticles by lymphocytes, neutrophils and monocytes in the blood (Fig. 4j-o and Fig. 5f).

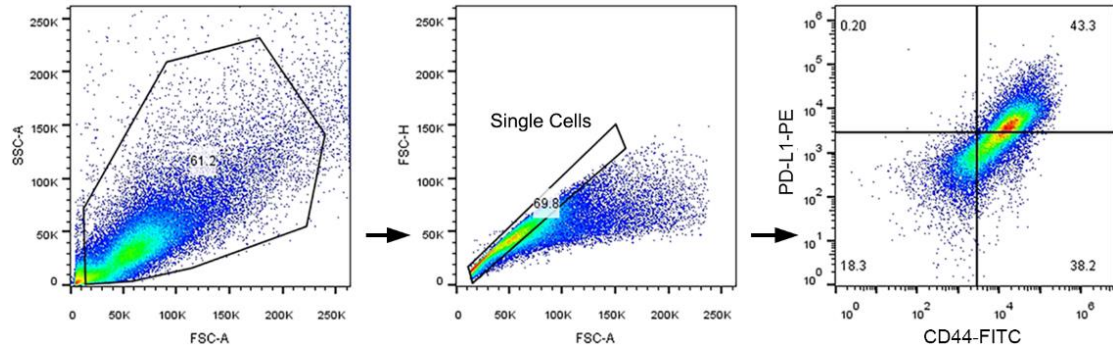

**Supplementary Figure 59.** Gating strategy to quantify CD44<sup>+</sup>PD-L1<sup>+</sup> cells in tumors (Fig. 6c, Fig. 7b and Supplementary Figure 45d).



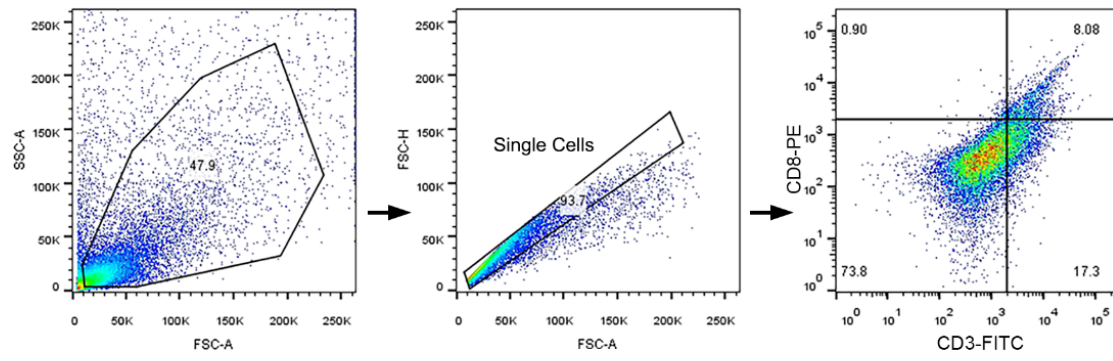

**Supplementary Figure 60.** Gating strategy to quantify CD3<sup>+</sup>CD8<sup>+</sup> cells in tumors (Fig. 6d, Fig. 7c and Supplementary Figure 45e).

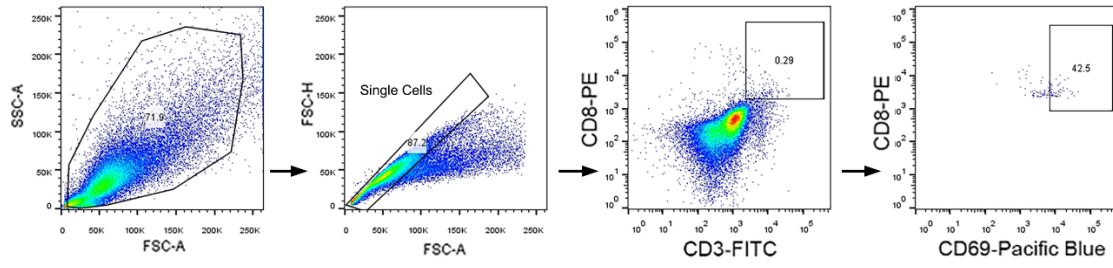

**Supplementary Figure 61.** Gating strategy to quantify CD69<sup>+</sup> cells in CD8 T cells in tumors (Fig. 6e and Fig. 7d).

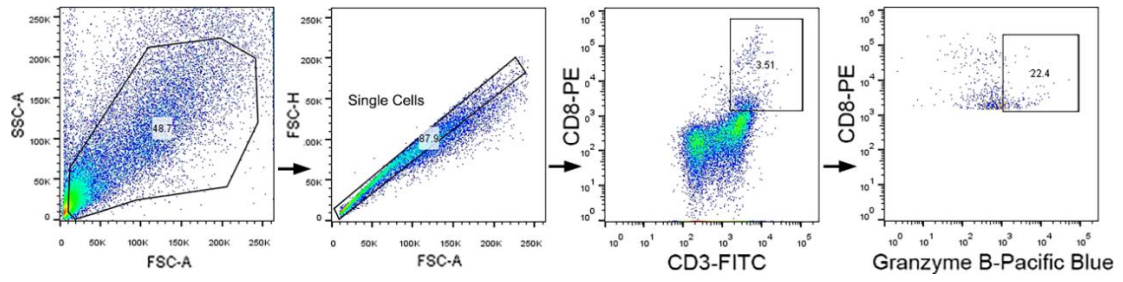

**Supplementary Figure 62.** Gating strategy to quantify Granzyme B<sup>+</sup> cells in CD8 T cells in tumors (Fig. 6f and Fig. 7e).

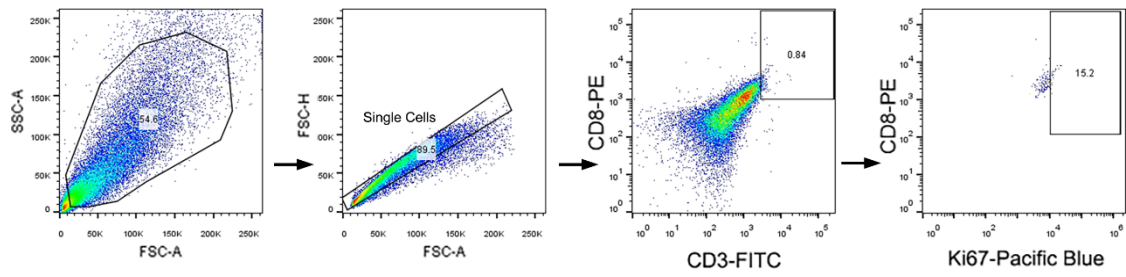

**Supplementary Figure 63.** Gating strategy to quantify Ki67<sup>+</sup> cells in CD8 T cells in tumors (Fig. 6g and Fig. 7f).

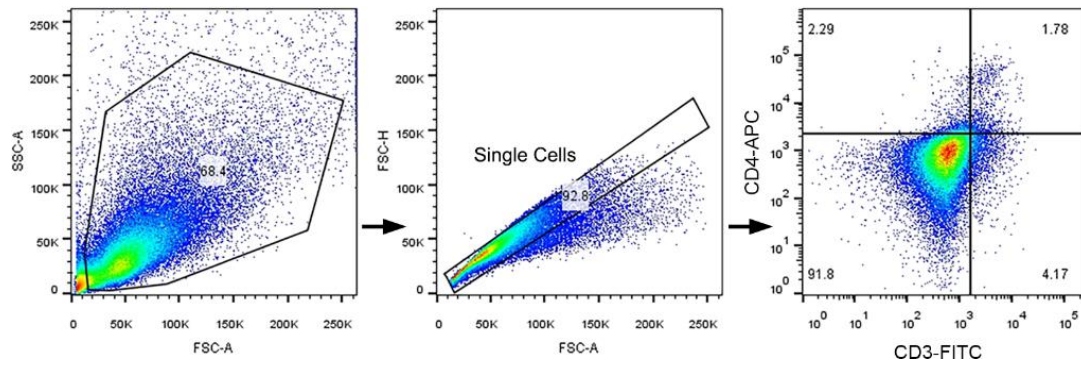

**Supplementary Figure 64.** Gating strategy to quantify CD3<sup>+</sup>CD4<sup>+</sup> cells in tumors (Fig. 6h and Fig. 7g).

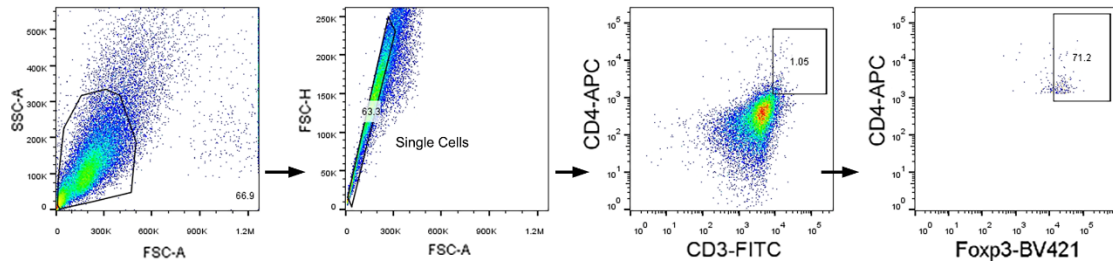

**Supplementary Figure 65.** Gating strategy to quantify Foxp3<sup>+</sup> cells in CD4 T cells in tumors (Fig. 6i and Fig. 7h).

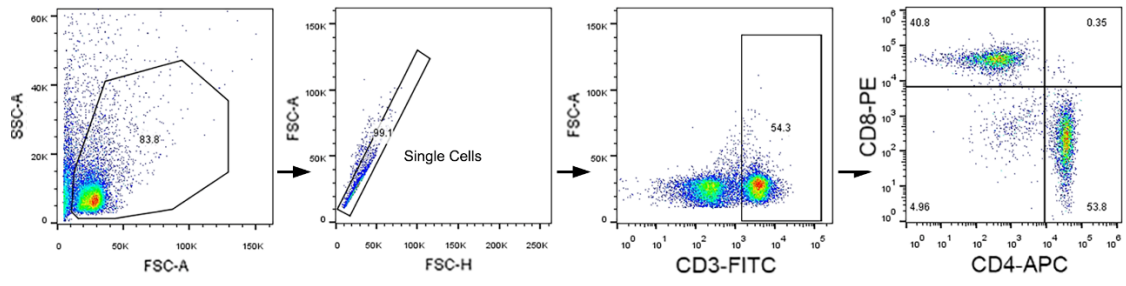

**Supplementary Figure 66.** Gating strategy to quantify the proportions of CD8<sup>+</sup> and CD4<sup>+</sup> T cells in TdLNs in mice (Supplementary Figure 41a, b).

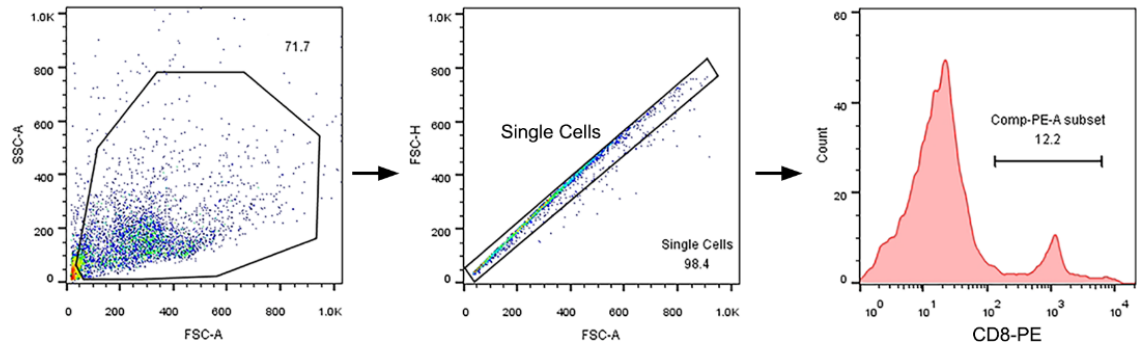

**Supplementary Figure 67.** Gating strategy to quantify CD8<sup>+</sup> T cells in splenocytes and purified splenocytes (Supplementary Figure 8a).



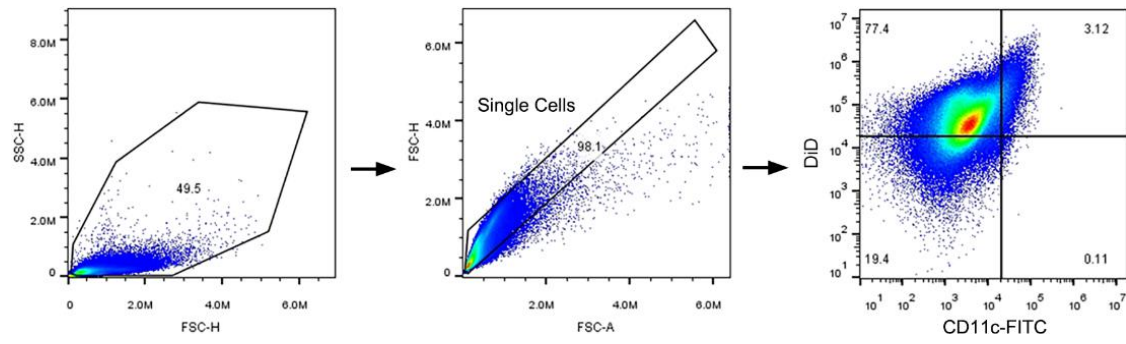

**Supplementary Figure 68.** Gating strategy to quantify the uptake of nanoparticles by DCs in tumors (Supplementary Figure 11a, b).

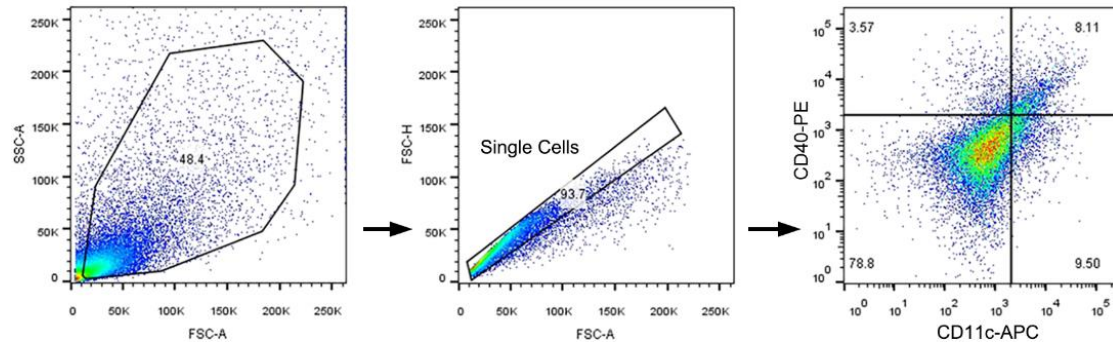

**Supplementary Figure 69.** Gating strategy to quantify CD11c<sup>+</sup>CD40<sup>+</sup> cells in tumors (Supplementary Figure 30a).

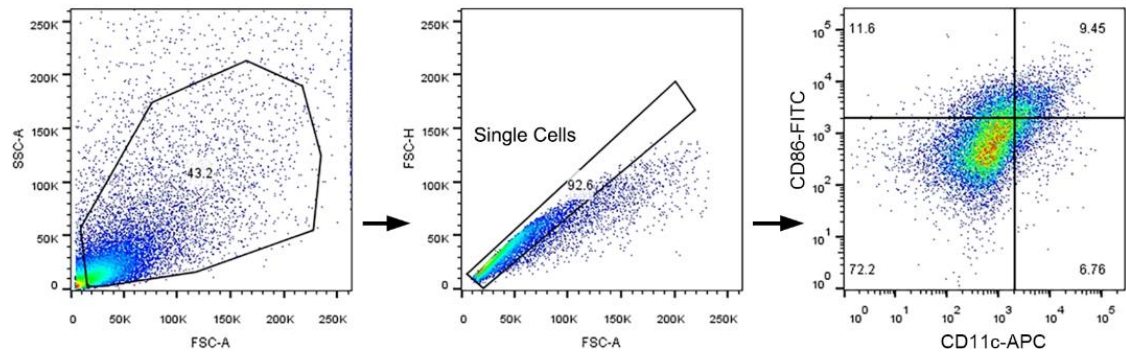

**Supplementary Figure 70.** Gating strategy to quantify CD11c<sup>+</sup>CD86<sup>+</sup> cells in tumors (Supplementary Figure 30b and Supplementary Figure 38c).

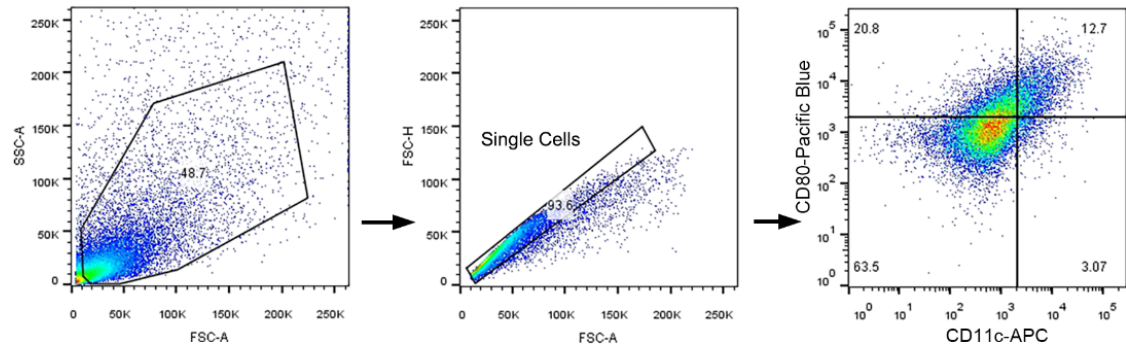

**Supplementary Figure 71.** Gating strategy to quantify CD11c<sup>+</sup>CD80<sup>+</sup> cells in tumors (Supplementary Figure 30c).

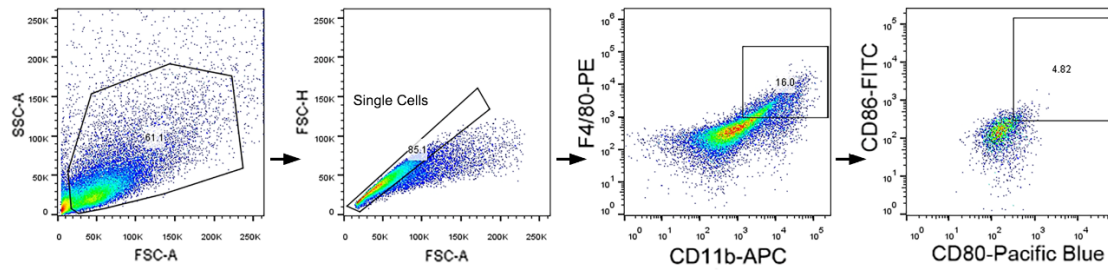

**Supplementary Figure 72.** Gating strategy to quantify CD80<sup>+</sup>CD86<sup>+</sup> cells in CD11b<sup>+</sup>F4/80<sup>+</sup> cells in tumors (Supplementary Figure 31a, Supplementary Figure 38a, Supplementary Figure 45g and Supplementary Figure 49g).

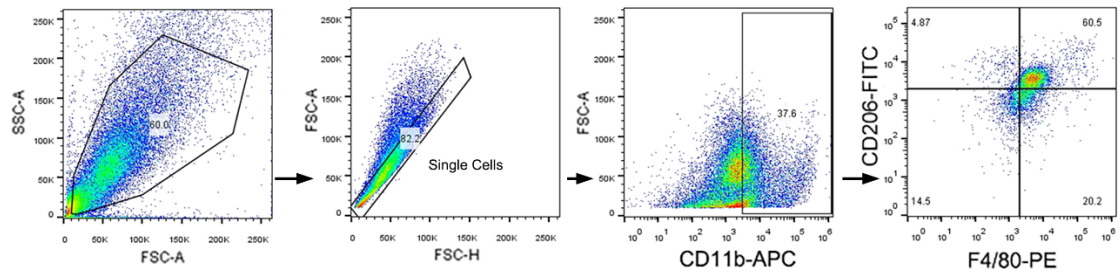

**Supplementary Figure 73.** Gating strategy to quantify CD206<sup>+</sup>F4/80<sup>+</sup> cells in CD11b<sup>+</sup> cells in tumors (Supplementary Figure 31b).

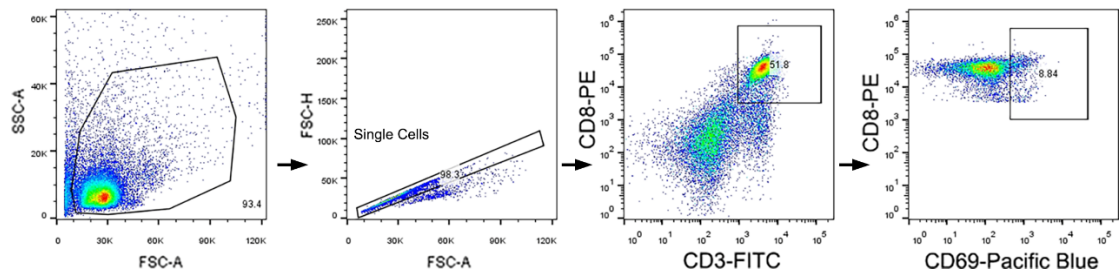

**Supplementary Figure 74.** Gating strategy to quantify CD69<sup>+</sup> cells in CD8 T cells in TdLNs (Supplementary Figure 33a, Supplementary Figure 39c).

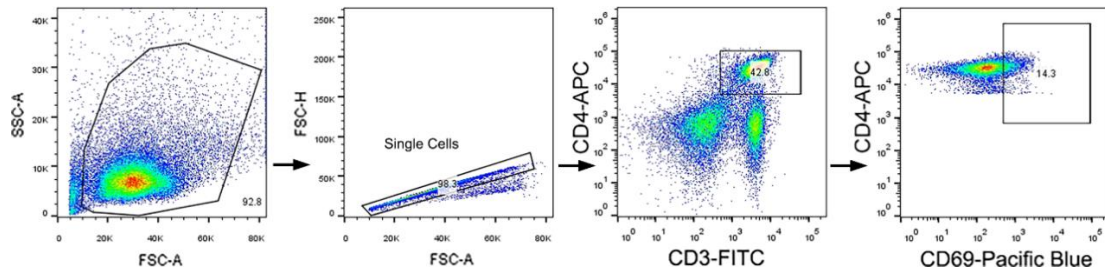

**Supplementary Figure 75.** Gating strategy to quantify CD69<sup>+</sup> cells in CD4 T cells in TdLNs (Supplementary Figure 33b, Supplementary Figure 39d).



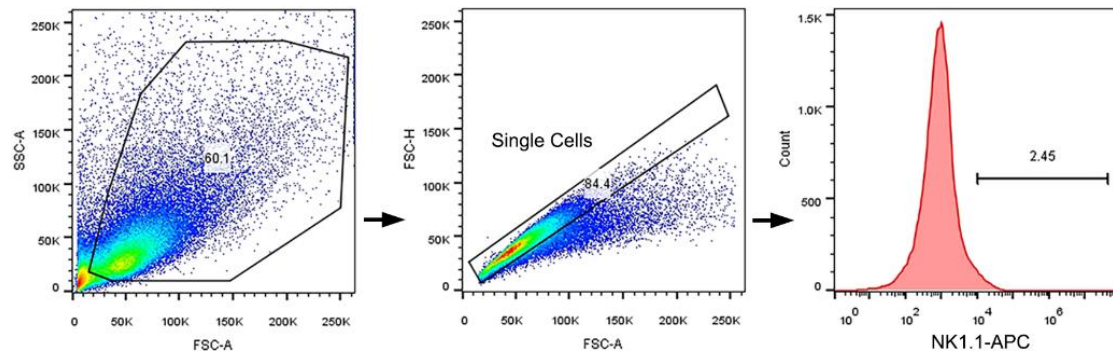

**Supplementary Figure 76.** Gating strategy to quantify NK1.1<sup>+</sup> cells in tumors (Supplementary Figure 38b, Supplementary Figure 45f).

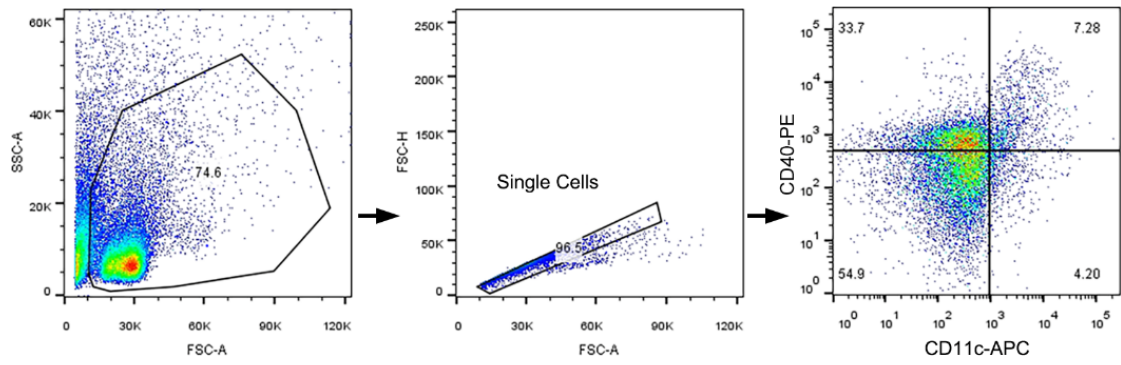

**Supplementary Figure 77.** Gating strategy to quantify CD11c<sup>+</sup>CD40<sup>+</sup> cells in TdLNs (Supplementary Figure 39a).

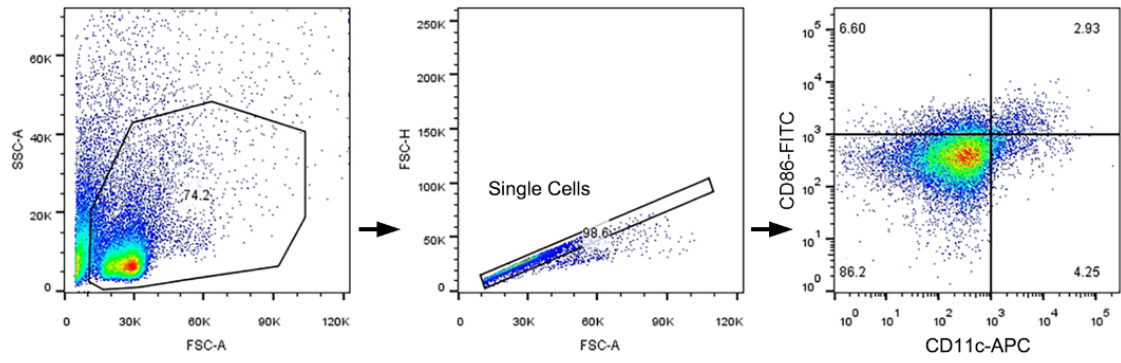

**Supplementary Figure 78.** Gating strategy to quantify CD11c<sup>+</sup>CD86<sup>+</sup> cells in TdLNs (Supplementary Figure 39b).

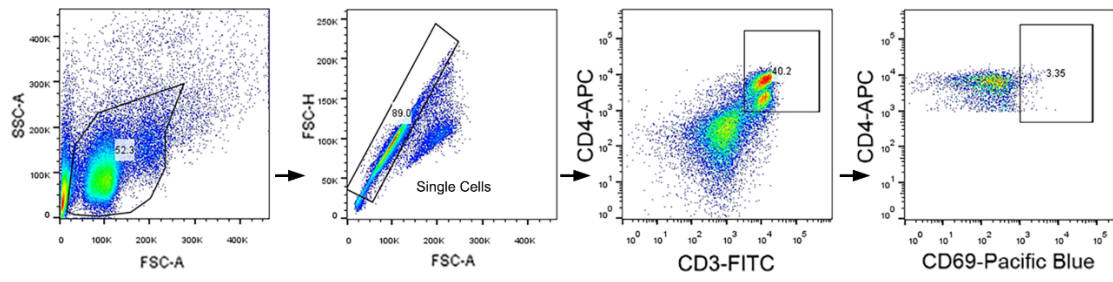

**Supplementary Figure 79.** Gating strategy to quantify CD69<sup>+</sup> cells in CD4 T cells in splenocytes (Supplementary Figure 40a).

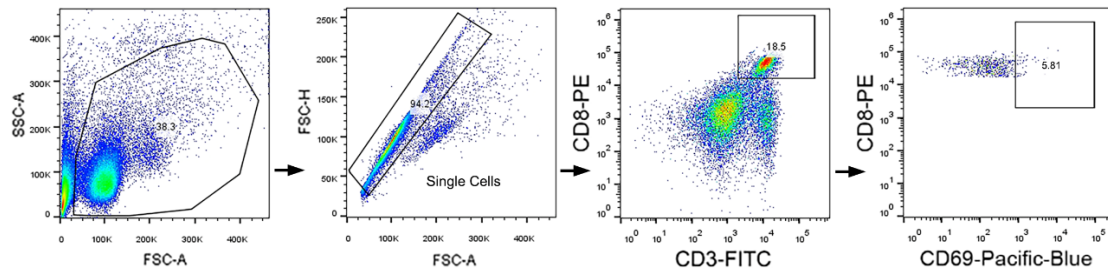

**Supplementary Figure 80.** Gating strategy to quantify CD69<sup>+</sup> cells in CD8 T cells in splenocytes (Supplementary Figure 40b).

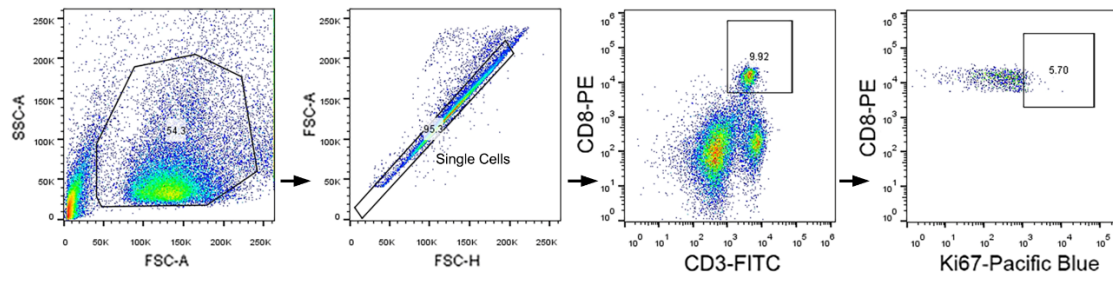

**Supplementary Figure 81.** Gating strategy to quantify Ki67<sup>+</sup> cells in CD8 T cells in splenocytes (Supplementary Figure 40c).

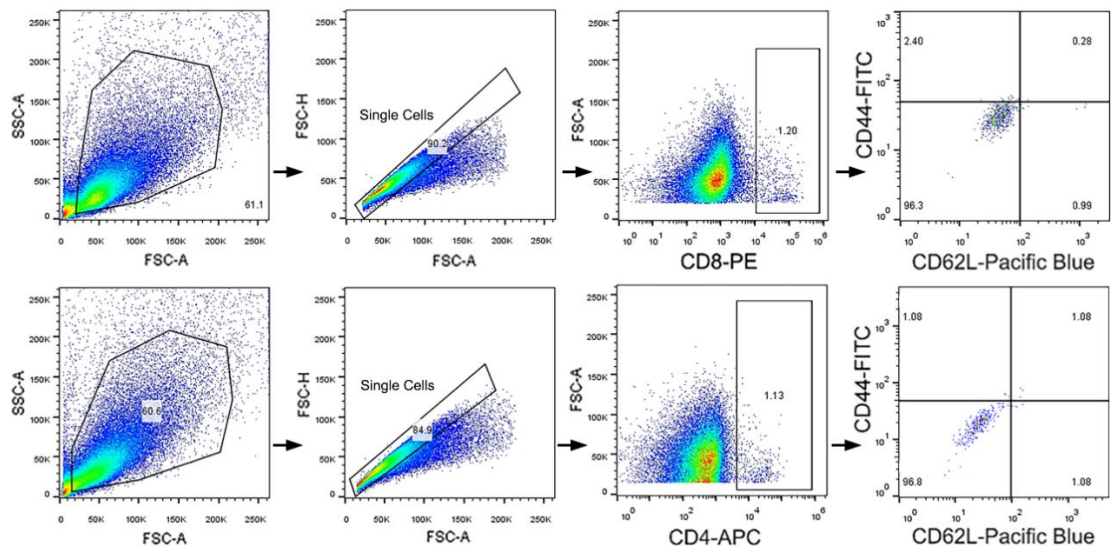

**Supplementary Figure 82.** Gating strategy to quantify memory T cells in tumors (Supplementary Figure 32).

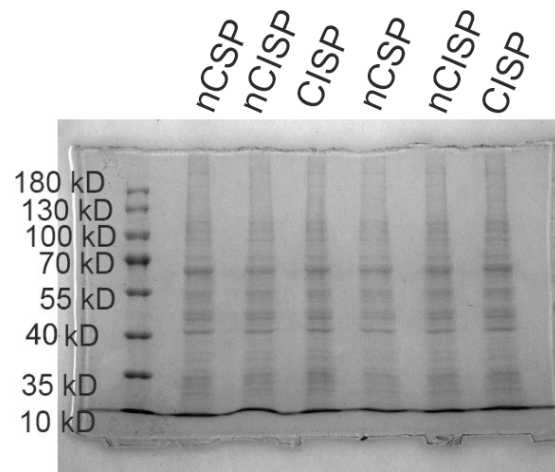

**Supplementary Figure 83.** Uncropped scans of gel presented in supplementary Figure 4.



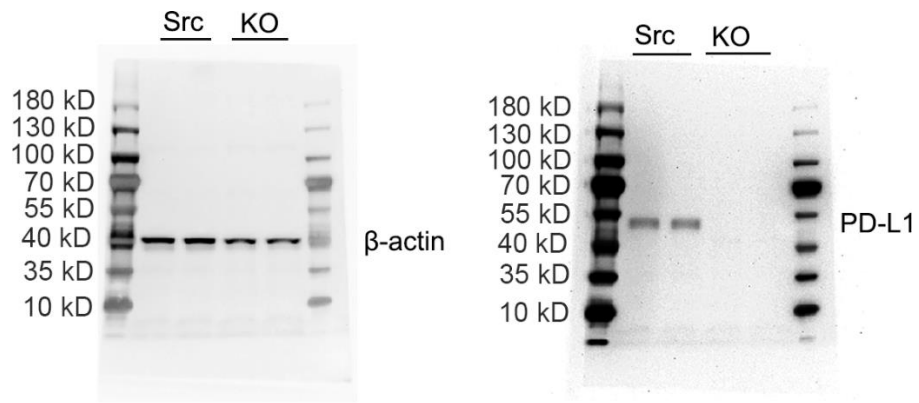

Anti-β-actin (abcam, ab8226)

Anti-PD-L1 (abcam, ab213480)

**Supplementary Figure 84.** Uncropped scans of blots presented in supplementary Figure 7a.

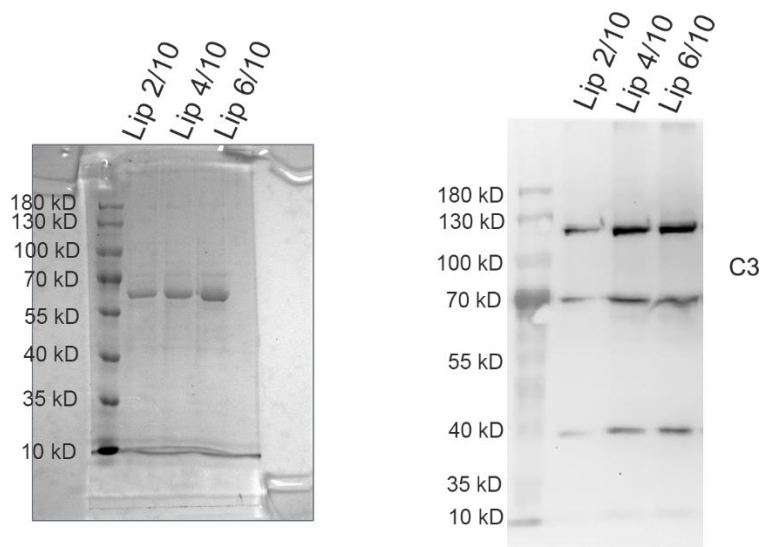

Anti-C3 (abcam, ab200999)

**Supplementary Figure 85.** Uncropped scans of gel and blot presented in supplementary Figure 27a, b.
